# Supplementary material
Source: PubMed Central journal article supplement (PMC2813701)
Supplement: NIHMS171428-supplement-Supp_Data.pdf [file NIHMS171428-supplement-Supp_Data.pdf]

## ***Supporting online material***

### **Materials and Methods**

#### *Yeast strains*

All yeast strains were derived from an S288C *lys1Δ::kanMX; arg4Δ::kanMX* parent (a generous gift of Ole Jensen, University of Southern Denmark). Additional strains were *cdc28Δ::cdc28-as1* (LH152) and *cdc28Δ::cdc28-as1; Clb2-HA::GAL-Clb2-ΔN-URA3* (LH518).

#### *Yeast culture conditions*

We used the analog-sensitive *cdk1-as1* strain, in which the endogenous copy of the *CDK1* gene is replaced with a gene encoding a point mutant (F88G) that expands the ATP binding site of the kinase, rendering the mutant Cdk1-as1 enzyme uniquely sensitive to the bulky inhibitor 1-NM-PP1 (1). This strain allows rapid chemical inhibition of Cdk1-as1 *in vivo*. Proteins that are dynamically regulated by phosphorylation by Cdk1 and dephosphorylation by competing phosphatases (e.g. Cdc14 and PP2A) will be rapidly dephosphorylated following kinase inhibition.

To allow quantitative mass spectrometry, it is necessary to compare chemically identical phosphopeptides from two different conditions. To achieve this, we used cells of an *arg4Δ; lys1Δ* background that rely upon arginine and lysine supplied from the medium (2). We then supplied either unlabeled lysine and arginine to the “light” culture or lysine and arginine in which every carbon and nitrogen is a heavy isotope to the “heavy” culture (heavy-labeled amino acids L-Lysine·2HCl ( $U-^{13}C_6$ , 98%;  $U-^{15}N_2$ , 98%) and L-Arginine·HCl ( $U-^{13}C_6$ , 98%;  $U-^{15}N_4$ , 98%) were obtained from Cambridge Isotope Laboratories, Inc.). After 18 h, cell populations had undergone 9-12 doublings, and the heavy culture had incorporated almost 100% heavy arginine and lysine. The heavy culture was then treated for 15 min with 10  $\mu$ M 1-NM-PP1 to inhibit Cdk1-as1.

Three different experiments were performed, to maximize the number of Cdk1 substrates detected and increase confidence in our site identification. First, we used asynchronous log-phase cultures. Second, cells were treated with nocodazole for 3 h to produce a metaphase arrest with high Cdk1 activity, resulting in larger numbers of Cdk1-

dependent phosphorylation events. However, one of the major Cdk1-opposing phosphatases (Cdc14) is thought to be inactive in these cells (3, 4). Since this experiment depends upon the activity of counteracting phosphatases, we performed a third experiment in which cells were arrested in late mitosis by expression of a non-degradable truncated cyclin (Clb2- $\Delta$ 2-176) from the *GAL1* promoter. In this arrest, Cdk1 activity is high and Cdc14 is at least partially active (3, 4). This approach yielded even more phosphorylation sites that decreased in concentration after Cdk1 inhibition. About 40% of the Cdk1-dependent phosphorylation sites from the third experiment were also detected in at least one of the other experiments; in 90% of these cases, these phosphopeptides decreased in abundance after Cdk1 inhibition in at least two experiments (Database S2).

### *Preparation of peptides*

Phosphopeptide preparation and analysis were based on previous methods (5-7). Cultures were harvested by centrifugation (4000 rpm, 5 min, 4°C), and the heavy- and light-labeled cells were mixed together prior to lysing in denaturing conditions by bead-beating at 4°C (4 cycles of 90 s, with 60 s breaks in between) in a buffer containing 50 mM Tris pH 8.2, 8 M urea, 75 mM NaCl, 50 mM NaF, 50 mM  $\beta$ -glycerophosphate, 1 mM sodium orthovanadate, 10 mM sodium pyrophosphate and one protease inhibitor cocktail tablet (complete mini, EDTA-free, Roche) per 10 ml. The protein extract was then separated from the beads and insoluble material.

The protein concentration in the lysate was determined by BCA protein assay (Pierce) and ten milligrams of protein were subjected to disulfide reduction with 5 mM DTT (56°C, 25 min) and alkylation with 15 mM iodoacetamide (room temperature, 30 min in the dark). Excess iodoacetamide was captured with 5 mM DTT (room temperature, 15 min in the dark).

The denatured protein extract was then digested with 5 ng/ $\mu$ l trypsin in 25 mM Tris pH 8.2, 1 mM CaCl<sub>2</sub>, 1.5 M urea, at 37°C for 15 h to yield a tryptic lysate. Because trypsin cleaves after arginine or lysine, heavy and light versions of every peptide (except the very C-terminal peptide of each protein) should be distinguishable based upon the mass difference between the heavy and light versions of at least one lysine or arginine.

### *Phosphopeptide enrichment*

Peptide mixtures were acidified by addition of 10% TFA to a final concentration of 0.4%, clarified by centrifugation and desalted in a 500 mg tC<sub>18</sub> SepPak cartridge (Waters). Peptides were then separated into 12 fractions by SCX chromatography on a Polysulfoethyl Aspartimide (PolyLC) semi-preparative column as described (7). Each fraction was then enriched for phosphopeptides by Immobilized Metal Ion Affinity Chromatography (IMAC). Desalted peptides were dissolved in 120 µl of IMAC binding buffer (40% ACN, 25 mM FA) and incubated for 60 min with 10 µl PhosSelect IMAC resin (Sigma, St. Louis, MO) that had been previously equilibrated in the same buffer. The supernatant, containing non-phosphorylated peptides, was collected and dried for LC-MS/MS analysis to allow normalization of peptide quantifications (see below). The IMAC resin was then washed three times with 120 µl IMAC binding buffer and peptides were eluted with 3 x 70 µl 50 mM KH<sub>2</sub>PO<sub>4</sub> /NH<sub>3</sub> pH 10.0. Eluted peptides were acidified with FA, dried and desalted with C<sub>18</sub> Empore disks.

To increase the number of substrates, additional enrichment protocols were used for some experiments. For the asynchronous cells experiment, protein fractionation by SDS-PAGE was combined with IMAC phosphopeptide enrichment. For the nocodazole-arrested cells experiment, desalted SCX fractions were split in two and one sample was enriched by IMAC and the other by TiO<sub>2</sub> phosphopeptide enrichment. For the late mitotic arrest experiment, technical replicates were obtained by analyzing each sample twice by LC-MS/MS.

### *LC-MS/MS analysis*

Dried phosphopeptides (IMAC bound) and non-phosphorylated peptides (IMAC supernatant) were resuspended in 15 µl and 800 µl 5% ACN, 4% FA, respectively, and 1.5 µl was loaded onto a microcapillary column packed with C18 beads (Magic C18AQ, 5 µm, 200 Å, 125 µm x 18 cm) using a Famos autosampler (LC Packings). Peptides were separated by reverse-phase chromatography using an Agilent 1100 binary pump across a 60 min gradient of 7-28% ACN (in 0.125% FA) and online detected in a hybrid linear ion trap – Fourier transform ion cyclotron resonance (LTQ-FT, ThermoElectron, San Jose, CA) (asynchronous experiment) or a linear ion trap - Orbitrap (LTQ-Orbitrap, ThermoElectron, Bremen, Germany) (both mitotic arrest experiments) mass spectrometer using a data-

dependent TOP10 method. For each cycle, one full MS scan in the FT-ICR or the Orbitrap at  $1 \cdot 10^6$  AGC target was followed by 10 MS/MS in the LTQ at 5000 AGC target on the 10 most intense ions. Selected ions were excluded from further selection for 35 s. Ions with charge 1 or unassigned were also rejected. Maximum ion accumulation times were 1000 ms for full MS scan and 120 ms for MS/MS scans.

There was no significant overrepresentation in our mass spectrometry experiments of peptides predicted to come from protein loops and disordered regions (Table S4). Thus, the observed preferential distribution of phosphorylation sites in these regions is not due to bias in our detection methods.

#### *Database searches and data filtering*

RAW files were converted to the mzXML file format and imported into a relational database MySQL. Data analysis was performed using in-house software. MS/MS spectra were searched against a target-decoy *S. cerevisiae* ORF database using the Sequest algorithm (version 27, revision 12) (8), with 50 ppm precursor mass tolerance, tryptic enzyme specificity with 2 missed cleavages allowed and static modification of cysteines (+57.02146, carboxamidomethylation). Dynamic modifications were 79.96633 Da on Ser, Thr and Tyr (phosphorylation), 8.01420 Da on Lys (heavy), 10.00827 Da on Arg (heavy) and 15.99491 Da on Met (oxidation). XCorr and dCn' score cutoffs, mass deviation (in ppm) and peptide solution charge were empirically determined using decoy matches as a guide and aiming to maximize the number of peptide spectral matches while maintaining an estimated false-discovery rate (FDR) of  $\leq 1\%$ .

#### *Phosphorylation site localization*

Identified phosphopeptides (Database S1) were submitted to the A-score algorithm for precise site localization (5). Sites with A-score values greater than 13 were considered localized (at 95% confidence) and used for further analysis.

#### *Peptide quantification*

Relative quantifications of heavy-light peptide pairs were automatically performed from MS scans by peak intensity ratio at the XIC (extracted ion chromatogram) maxima using in-house Vista software (9). Roughly one third of all quantifications were discarded due to low

quality, including low signal-to-noise. Database S2 lists all peptides for which high-confidence quantification and H/L ratios were obtained.

#### *Data normalization*

Non-phosphorylated peptides were used as controls for normalizing ratio distributions due to uneven cell mixing of heavy and light populations. The phosphopeptide  $\log(H/L)$  ratios were normalized for each independent experiment by subtracting the median  $\log_2(H/L)$  from the corresponding non-phosphopeptide distribution. These corrected H/L ratios are shown in Database S2 and were used for all subsequent analyses.

#### *Structure prediction*

The structural environment of Cdk1-dependent phosphorylation sites was evaluated using secondary structure, domain and disorder prediction algorithms (10-14). The presence of a proline in the Cdk1 consensus site automatically causes the PsiPred algorithm to assign a loop. However, the PONDR algorithm does not have this limitation and indicates that Cdk1-dependent phosphorylation sites are preferentially localized within unstructured regions and outside of Pfam domains (binomial p-value  $< 10^{-29}$  and  $< 10^{-6}$ , respectively, Table S4).

## Supporting figures

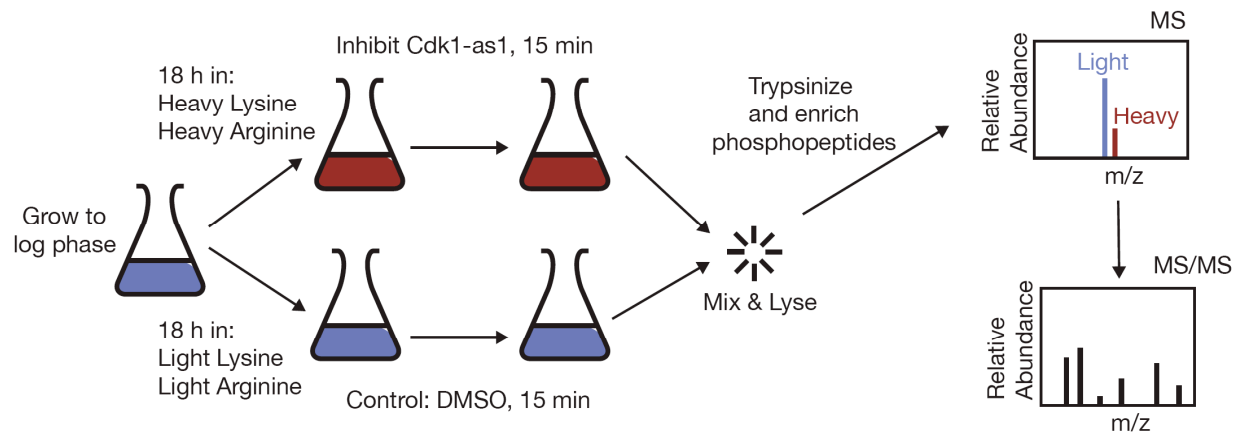

**Fig. S1.** Overview of phosphopeptide identification and relative quantification. Quantitative mass spectrometry was used to identify phosphorylation sites whose abundance decreased *in vivo* following Cdk1 inhibition. Cells of an *arg4Δ; lys1Δ* background were supplied with either regular lysine and arginine (“light” culture; blue) or lysine and arginine in which every carbon and nitrogen is a stable heavy isotope (“heavy” culture; red). 10  $\mu$ M 1-NM-PP1 was added to the heavy culture for 15 min to inhibit Cdk1. The heavy and light cultures were mixed prior to lysing in denaturing conditions. Protein extracts were then trypsinized, and phosphopeptides were purified and analyzed by tandem mass spectrometry to determine the precise amino acid sequence and sites of phosphorylation (5-7), as well as the relative abundance of the phosphopeptide in the heavy and light cultures.

A. Context-dependent

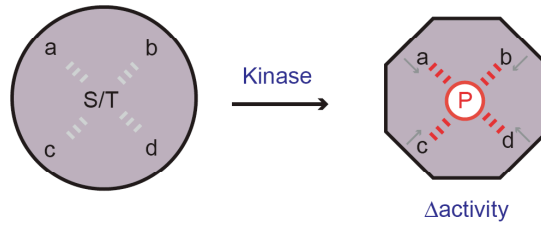

B. Plastic

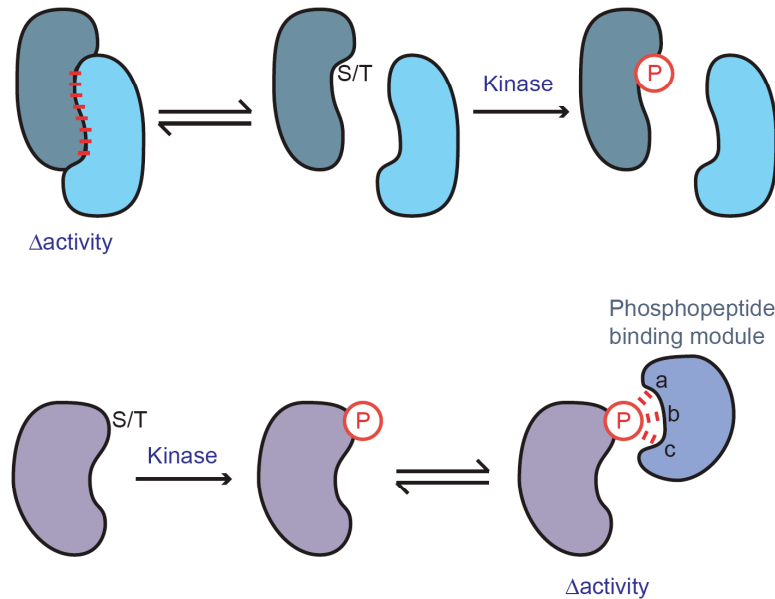

**Fig. S2.** Mechanisms of phosphoregulation. **(A)** Schematic of a form of phosphoregulation that is highly context-dependent: upon phosphorylation of a serine or threonine (S/T), a phosphate (red P) coordinates hydrogen bonds from several neighboring amino acids (a-d) to drive a precise conformational change (indicated by the change in shape from circle to octagon) and thereby alters protein activity. The precise position of the phosphate is important in this type of regulation because the phosphate needs to coordinate interactions with several amino acids. **(B)** Schematic of flexible modes of phosphoregulation. Phosphates can affect protein activity by simply preventing protein interactions (top) or by binding to modular phosphate-binding domains (bottom). This type of regulation is more plastic because similar regulation can be inferred from several positions of phosphorylation within the protein.

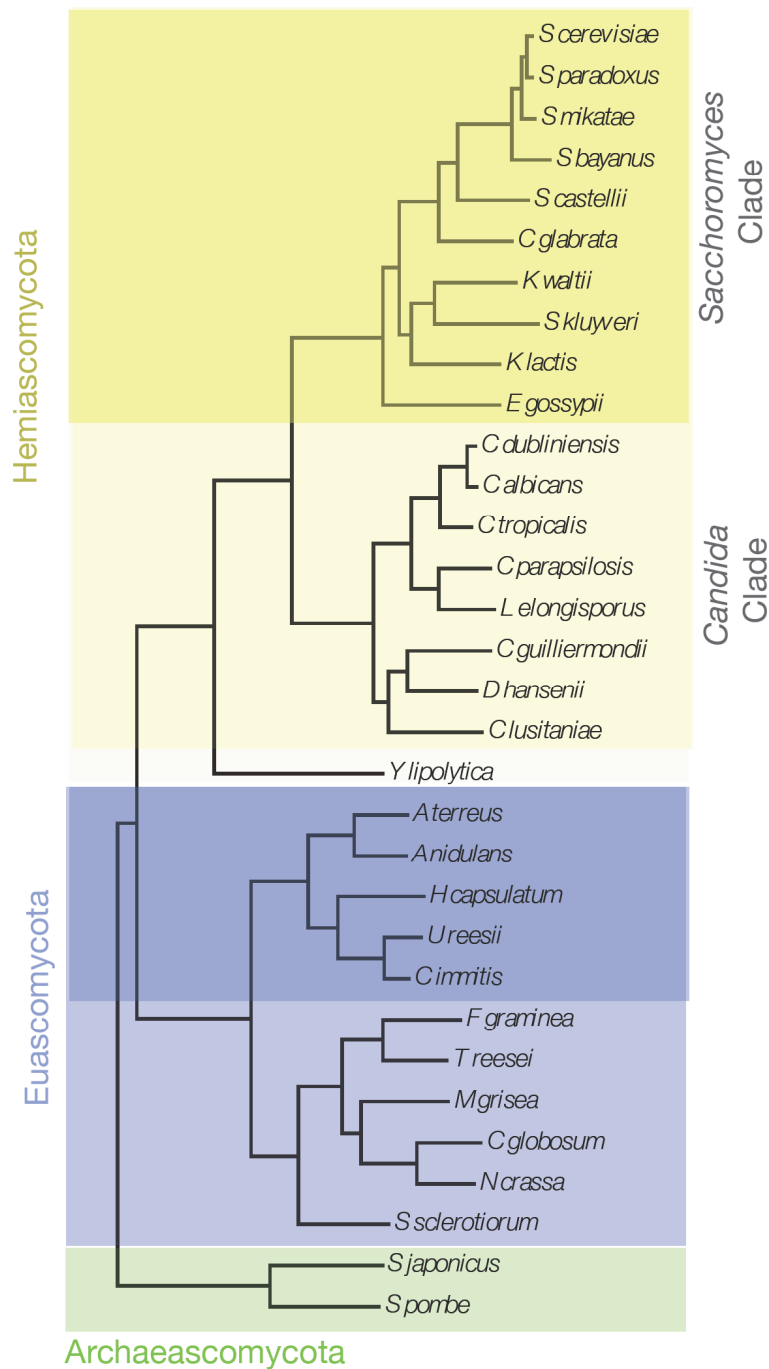

**Fig. S3.** The ascomycete phylogeny. A phylogeny describing the evolutionary relationships among 32 ascomycete species was inferred using a genomic approach (15). The major clades are distinguished by color: Hemiascomycota (yellow); Euascomycota (blue); and Archaeascomycota (green). The Hemiascomycota contain two clades that are relatively well separated in terms of their behavior in our analyses: the *Saccharomyces* clade and the *Candida* clade.



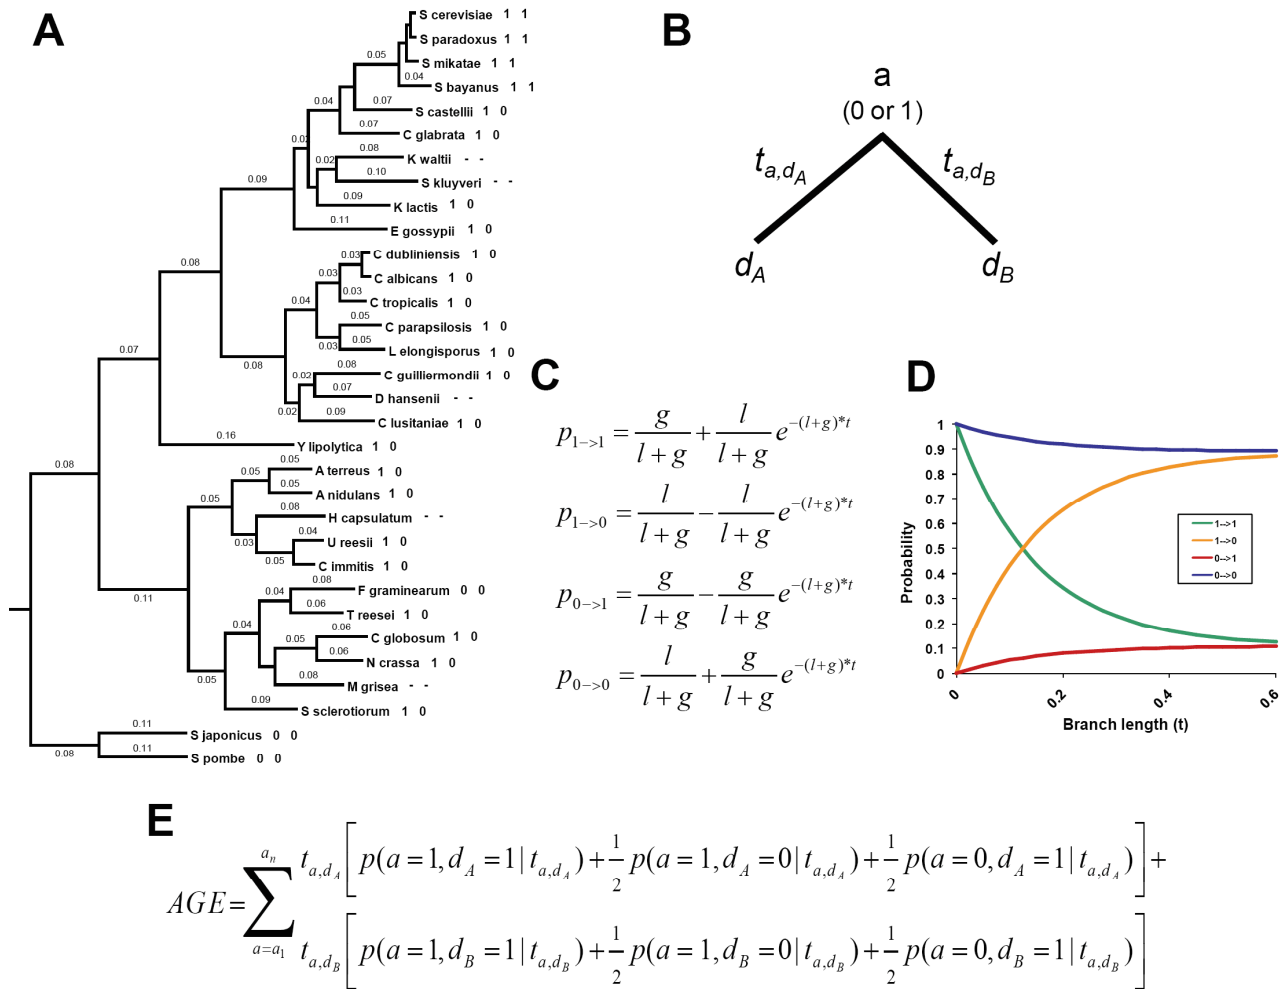

**Fig. S4.** Maximum likelihood method for inferring the “age” of a precise phosphorylation site or the “age” of enrichment of consensus sites in a protein. We inferred the “age” (i.e., level of conservation within the fungal phylogeny) of each phosphorylation site identified experimentally in *S. cerevisiae*. Our approach was to first assign presence (1) and absence (0) calls to each of the extant species nodes (i.e., the leaf nodes) based on conservation of the consensus Cdk1 site at the same position within a multiple sequence alignment of orthologous proteins. The species tree used (**A**) was inferred from concatenated alignments of orthologs and is robust to choice of inference algorithm (ML, parsimony and distance), as described elsewhere (15). The number next to each branch indicates branch length ( $t$ ) and the leaf nodes are annotated with presence/absence calls for the two phosphorylation sites of Shp1 from Fig. 4A (sites A and B, respectively). Using

a simple two-rate model of phosphorylation site gain (g) and loss (l), the probabilities of presence and absence at each ancestral node (a) were calculated recursively, from the leaf nodes up (**B**). The gain and loss rates used in this analysis were inferred globally across our entire dataset by maximum likelihood. The probabilities of gain and loss (defined in **C**; e.g.,  $p_{0 \rightarrow 1}$  denotes the probability of gain along a branch) are a function of  $t$  (**D**). When  $t$  is small the probabilities of gain ( $p_{0 \rightarrow 1}$ ) and loss ( $p_{1 \rightarrow 0}$ ) are near zero and as  $t$  increases these probabilities increase, reaching their equilibrium levels as  $t$  extends past 0.5. Age is defined as the weighted sum of branch lengths over which a site was inferred to be present (**E**), where the weight is just the probability that the phosphorylation site was maintained ( $p_{1 \rightarrow 1}$ ) or half the probability that it was gained ( $p_{0 \rightarrow 1}$ ) or lost ( $p_{1 \rightarrow 0}$ ) along that branch. The example phosphorylation sites for Shp1 (shown here in panel **A** and also in Fig. 4A) have ages of 2.61 and 0.65, respectively.

The same method was used to infer the age of enrichment of consensus sites within each ORF found to be phosphorylated in our *S. cerevisiae* experiments. The difference in this case is that presence and absence calls made at the extant species nodes are based on enrichment of consensus phosphorylation motifs within each orthologous ORF (Poisson  $p < 0.01$  for presence of enrichment).

We expected that this method would help normalize for the effects of an uneven sampling of phylogeny (i.e., the fact that some branches of the tree are more densely populated by sequenced genomes than other parts). Indeed, as can be seen in Fig. 4B, the inferred ages have this desired property; for example, the four very closely related species of the *Saccharomyces sensu stricto* group do not contribute unfairly (i.e., as much as four more divergently related species do) to the age calculations.

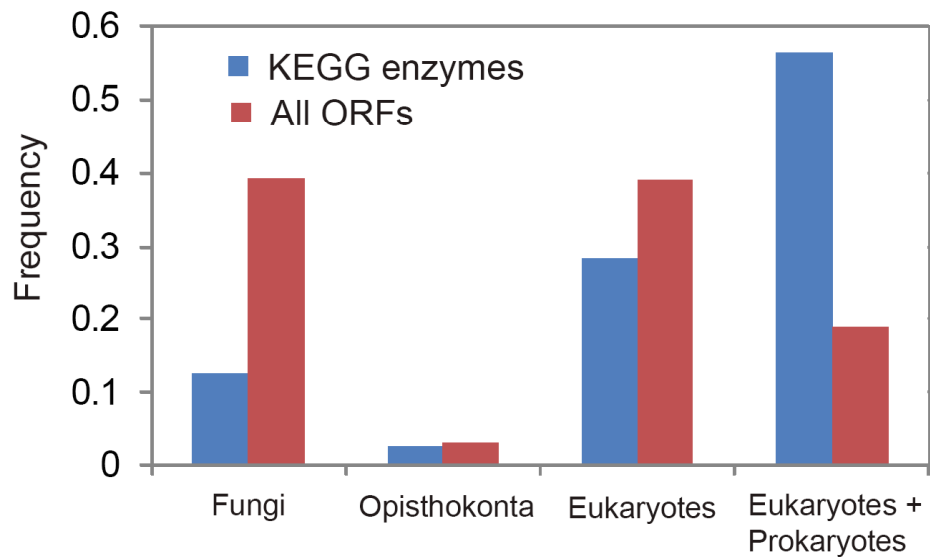

**Fig. S5.** ORFs encoding metabolic enzymes are old. The inferred ages of *S. cerevisiae* ORFs annotated as metabolic enzymes in the KEGG database (blue bars; N = 734; <http://www.genome.jp/kegg/>) were compared to the inferred ages for all ORFs in *S. cerevisiae* (red bars; N = 5480). Each ORF from *S. cerevisiae* was assigned to one of four age groups based on the most distantly related organism that was predicted to have an ortholog in the OrthoMCL ortholog mapping (16): (1) found only in fungi; (2) found only in opisthokonta (fungi and metazoa); (3) found only in eukaryotes; and (4) found in both eukaryotes and prokaryotes. More than 50% of metabolic enzymes from *S. cerevisiae* can be mapped to putative orthologs in prokaryotes, whereas this is true for less than 20% of ORFs in general. The two distributions are significantly different (Mann-Whitney  $p < 10^{-16}$ ).

**A**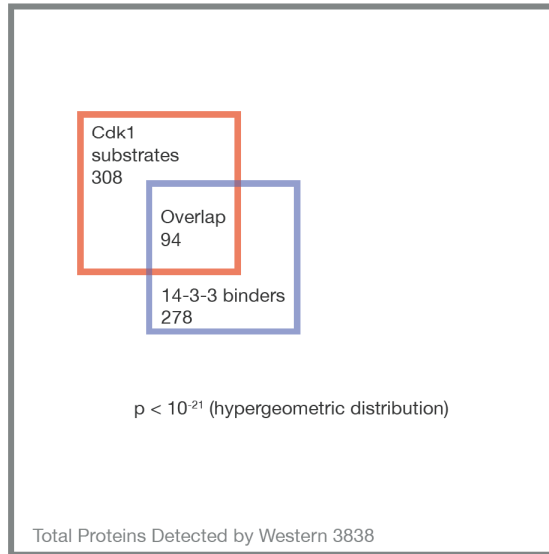**B**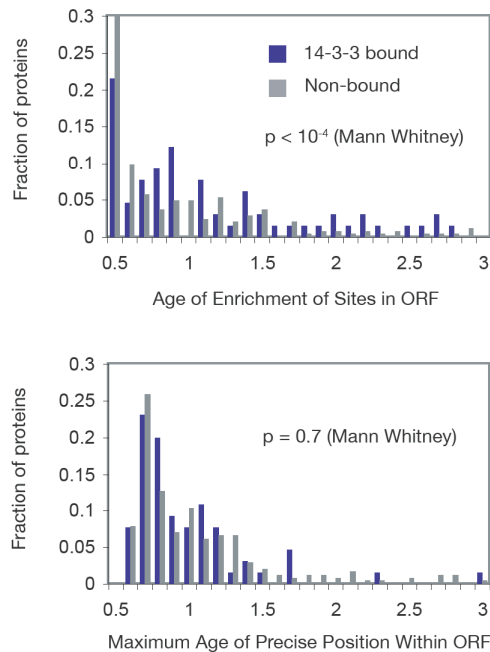

**Fig. S6.** Cdk1 targets are frequently bound by 14-3-3 proteins. **(A)** Venn diagram showing the 308 proteins that are phosphorylated by Cdk1 (red box) and the 278 proteins that were determined to interact with Bmh1 & Bmh2 in a phosphorylation-dependent manner (17) (blue box), and a conservative estimate of the total number of proteins that are present in mitotically proliferating cells (18) (gray box). Of the 278 proteins that were previously defined as 14-3-3 binding partners, 94 were targets of Cdk1. **(B)** Cdk1 target proteins that are bound by 14-3-3 proteins tend to have conservation of consensus site enrichment but not precise site position.

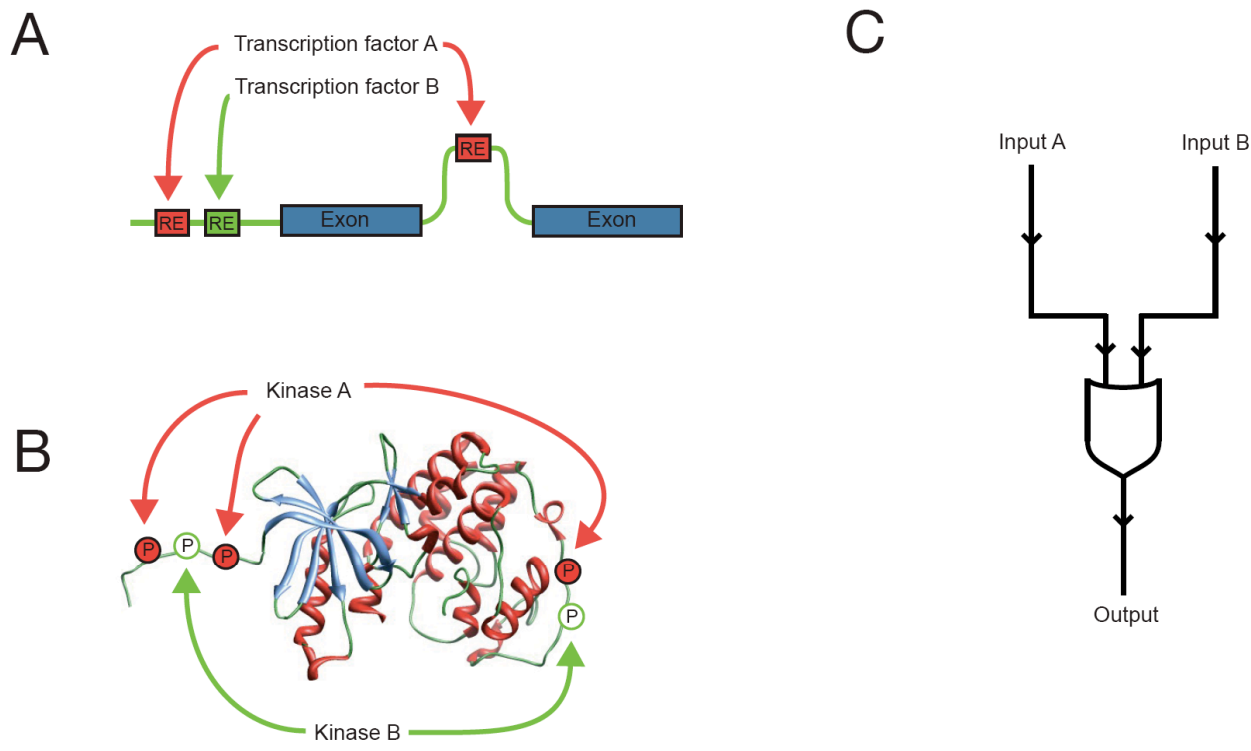

**Fig. S7.** Plasticity in transcriptional regulation and phosphoregulation. Just as simple transcriptional response elements are more likely to arise by small numbers of mutations in relatively unconstrained intergenic regions (promoters or introns, **A**), phosphorylation sites are more likely to appear in disordered regions of proteins (termini or long loops, **B**). Context-independent mechanisms of activity modulation seem to predominate in both forms of regulation, allowing for relatively easy evolution of regulation. In the example presented here, combinatorial regulation by two distinct transcription factors or kinases creates an ‘OR’ logic gate (**C**).

## Supporting tables

**Table S1. (Following pages)** Summary of Cdk1-dependent phosphorylation sites. This table lists the 547 phosphorylation sites that meet our criteria for identification as Cdk1 substrates (see main text): that is, they are followed by a proline and they declined in abundance by at least 50% in one or more of the three experiments. The table includes the systematic ORF name, SGD name, position of the phosphorylation site in the protein sequence (with a “#” symbol after the phosphorylation site),  $\log_2$  heavy/light (H/L) phosphopeptide abundance ratio, “age” (weighted sum of branch lengths for which regulation is predicted to be conserved) of precise site conservation and enrichment of consensus sites. Green indicates that the site is found within one of the 181 proteins previously determined to be efficiently phosphorylated by Cdk1 *in vitro* (19). This is a conservative list of peptides in which the precise position of the phosphorylation site can be inferred with high confidence (A-score greater than or equal to 13, corresponding to >95% certainty). Phosphorylation events were typically detected in several peptides, and peptides were frequently phosphorylated at multiple positions. To reduce false positives, we used the H/L ratio from peptides that only contained phosphates on Cdk1 consensus sites, or otherwise we used the peptide with the least number of phosphates. Bold font indicates the biological replicates; that is, phosphorylation sites from peptides that declined in abundance by at least 50% following Cdk1 inhibition in one experiment and also declined after Cdk1 inhibition in another experiment (these sites are also listed separately in Table S2). Database S1 contains the full list of peptides with links to MS/MS spectra, and Database S2 contains all those phosphopeptides for which H/L ratios could be determined with high confidence. There are many additional Cdk1 substrate candidates within this dataset that do not match our stringent criteria for further analysis. Note also that our method ignores Cdk1-dependent phosphorylation sites that were not rapidly dephosphorylated in any of the three conditions tested; it seems likely that additional Cdk1 targets exist among the phospho-SP and phospho-TP peptides that did not decrease in abundance following Cdk1 inhibition.

| ORF     | SGDB name | Site position | Context           | log2 (H/L) | age precise position | age enrichment |
|---------|-----------|---------------|-------------------|------------|----------------------|----------------|
| YCR088W | ABP1      | 165           | PPVKKST#PSKSPAP   | -3.06      | 1.68                 | 0.95           |
| YCR088W | ABP1      | 169           | KSFTPSKS#PAPVSKK  | -3.06      | 0.63                 | 0.95           |
| YCR088W | ABP1      | 181           | SKKEPVKT#PSPAPAA  | -1.74      | 0.61                 | 0.95           |
| YCR088W | ABP1      | 183           | KEPVKTPS#PAPAAKI  | -1.32      | 0.63                 | 0.95           |
| YCR088W | ABP1      | 313           | KGFRNEKS#PAQLWAE  | -1.18      | 2.75                 | 0.95           |
| YLR131C | ACE2      | 486           | IPGSSNNT#PIKNSLP  | -3.51      | 1.76                 | 2.72           |
| YLR131C | ACE2      | 501           | QKHVFQHT#PVKAPPK  | -3.46      | 1.49                 | 2.72           |
| YLR131C | ACE2      | 392           | SPGGLSIS#PRINGNS  | -3.28      | 0.78                 | 2.72           |
| YLR131C | ACE2      | 385           | FRLF EKTS#PGGLSIS | -3.20      | 0.63                 | 2.72           |
| YLR131C | ACE2      | 303           | SNTSINGS#PSRKYHR  | -2.64      | 0.90                 | 2.72           |
| YLR131C | ACE2      | 428           | FTPRTQLS#PIHKKRE  | -2.48      | 0.86                 | 2.72           |
| YLR131C | ACE2      | 259           | GSPVILKT#PAMQNGR  | -2.24      | 0.83                 | 2.72           |
| YLR131C | ACE2      | 564           | SPTLHSTS#PLPDEII  | -2.07      | 0.56                 | 2.72           |
| YLR131C | ACE2      | 80            | LDIPLVPS#PKTGDGS  | -1.27      | 0.77                 | 2.72           |
| YLR131C | ACE2      | 253           | NSNSKPGS#PVILKTP  | -1.06      | 0.78                 | 2.72           |
| YJR083C | ACF4      | 49            | SKSPRVTT#PLKPKRL  | -3.10      | 0.65                 | 0.69           |
| YJR083C | ACF4      | 62            | RLAIPISS#PQRSTTN  | -3.04      | 0.91                 | 0.69           |
| YJR083C | ACF4      | 71            | QRSTTNQS#PVSDHAS  | -1.38      | 1.00                 | 0.69           |
| YDR216W | ADR1      | 188           | ASSVKFQT#PTYGTPD  | -2.07      | 0.60                 | 0.53           |
| YBR059C | AKL1      | 504           | DPTISEQS#PRLNTQS  | -2.86      | 0.60                 | 1.40           |
| YBR059C | AKL1      | 801           | EALLIELS#PLKEDAG  | -1.54      | 0.87                 | 1.40           |
| YJL122W | ALB1      | 80            | TLQNASSS#PASITTR  | -1.67      | 0.56                 | 0.43           |
| YOL130W | ALR1      | 143           | YVESNIHT#PPKDVGV  | -2.07      | 0.51                 | 0.43           |
| YOL130W | ALR1      | 188           | VRKSSLVS#PVLEIPH  | -1.45      | 0.61                 | 0.43           |
| YKR021W | ALY1      | 573           | VLSSPVLS#PNVQKMN  | -1.42      | 1.19                 | 1.48           |
| YJL084C | ALY2      | 213           | NGPSRNLS#PINLLKR  | -2.27      | 1.68                 | 1.65           |
| YJL084C | ALY2      | 176           | GLSSLNLS#PLGAPGN  | -1.56      | 0.81                 | 1.65           |
| YKL185W | ASH1      | 253           | TRSSKFHS#PSKESFD  | -1.23      | 0.60                 | 1.79           |
| YKL185W | ASH1      | 452           | RPKAYTPS#PRSPNYH  | -1.00      | 1.19                 | 1.79           |
| YKL185W | ASH1      | 450           | PVRPKAYT#PSPRSPN  | -1.00      | 0.96                 | 1.79           |
| YKL185W | ASH1      | 455           | AYTPSPRS#PNYHRFA  | -1.00      | 0.88                 | 1.79           |
| YKL052C | ASK1      | 250           | NSNNIESS#PLKQGHH  | -2.34      | 1.21                 | 0.43           |
| YGR097W | ASK10     | 808           | GFRSKVNT#PAIDDYG  | -2.47      | 1.29                 | 0.81           |
| YDL088C | ASM4      | 464           | SSPIVANS#PNKRLDV  | -1.08      | 0.61                 | 0.68           |
| YMR068W | AVO2      | 315           | VKTPVGV#PKKELVS   | -2.29      | 0.91                 | 1.47           |
| YBR068C | BAP2      | 16            | SSGKKETS#PDSISIR  | -1.11      | 0.60                 | 0.43           |
| YJL020C | BBC1      | 103           | KDLPEPIS#PETKKET  | -1.03      | 0.51                 | 1.10           |
| YJL095W | BCK1      | 816           | PKPPANTS#PQRTLST  | -2.73      | 0.83                 | 1.95           |
| YJL095W | BCK1      | 747           | PKMVFKTS#PKLELNL  | -1.36      | 0.84                 | 1.95           |
| YJL095W | BCK1      | 411           | HYETNVSS#PLKQSSL  | -1.33      | 0.89                 | 1.95           |
| YER167W | BCK2      | 418           | SSMSNRYS#PIRVASP  | -1.08      | 1.18                 | 0.83           |
| YIL033C | BCY1      | 89            | RSSVMFKS#PFVNEDP  | -1.19      | 1.71                 | 0.43           |
| YER155C | BEM2      | 1038          | MLINNPAT#PNQKMRD  | -1.47      | 0.70                 | 1.11           |
| YPL115C | BEM3      | 324           | ENKALGFS#PASKEKL  | -2.66      | 1.25                 | 2.84           |
| YPL115C | BEM3      | 254           | VINNHLHS#PLKASTS  | -2.50      | 0.91                 | 2.84           |
| YOR198C | BFR1      | 336           | ADDLVLVT#PKKDDFV  | -1.42      | 0.65                 | 0.43           |
| YFL007W | BLM10     | 11            | NNDDDIKS#PIPITNK  | -3.50      | 1.28                 | 0.43           |
| YFL007W | BLM10     | 29            | QLKRFRS#PGRPSSS   | -1.95      | 0.76                 | 0.43           |
| YNL233W | BNI4      | 410           | LRKNHDDT#PVKIDHV  | -2.64      | 0.51                 | 2.48           |
| YBL085W | BOI1      | 540           | FNRNMLS#PVKSSFD   | -4.26      | 0.88                 | 2.67           |
| YBL085W | BOI1      | 405           | PKPPSYPS#PVQPPQS  | -3.02      | 2.23                 | 2.67           |
| YBL085W | BOI1      | 412           | SPVQPPQS#PSFNNRY  | -3.02      | 1.21                 | 2.67           |
| YER114C | BOI2      | 652           | KKSSFMLS#PFRQQFT  | -4.07      | 1.68                 | 2.79           |
| YER114C | BOI2      | 450           | PKPPSYPS#PAQPPKS  | -1.78      | 1.18                 | 2.79           |
| YER114C | BOI2      | 457           | SPAQPPKS#PLLNNTR  | -1.78      | 1.05                 | 2.79           |
| YER114C | BOI2      | 519           | QGGGKALS#PIPSPTR  | -1.07      | 0.73                 | 2.79           |

| ORF            | SGDB name    | Site position | Context                  | log2 (H/L)   | age precise position | age enrichment |
|----------------|--------------|---------------|--------------------------|--------------|----------------------|----------------|
| <b>YER114C</b> | <b>BOI2</b>  | <b>523</b>    | <b>KALSPIPS#PTRNSVR</b>  | <b>-1.07</b> | <b>0.65</b>          | <b>2.79</b>    |
| YHR036W        | BRL1         | 56            | PHFPSSPS#PLRNTLD         | -2.12        | 1.89                 | 1.39           |
| YPR171W        | BSP1         | 296           | QLKPTTLS#PTMKNKP         | -1.14        | 0.76                 | 0.77           |
| <b>YPR171W</b> | <b>BSP1</b>  | <b>309</b>    | <b>KPKPTPPS#PPAKRIP</b>  | <b>-1.10</b> | <b>0.63</b>          | <b>0.77</b>    |
| YPR171W        | BSP1         | 39            | KPAGEALS#PVRSHNS         | -1.08        | 0.63                 | 0.77           |
| YPR171W        | BSP1         | 79            | YNYEMTFS#PKKTHYS         | -1.07        | 0.94                 | 0.77           |
| YKL092C        | BUD2         | 1066          | GNLGNRFS#PTKLSRI         | -2.17        | 0.65                 | 0.43           |
| YCL014W        | BUD3         | 1515          | NAQKVQES#PSGPLIY         | -1.86        | 0.75                 | 0.90           |
| <b>YCL014W</b> | <b>BUD3</b>  | <b>1440</b>   | <b>PVEELPNT#PR SINVT</b> | <b>-1.78</b> | <b>0.61</b>          | <b>0.90</b>    |
| YCL014W        | BUD3         | 1549          | KDEPIWVS#PSKIDFA         | -1.62        | 1.21                 | 0.90           |
| YJR092W        | BUD4         | 167           | PLLSYPES#PIHRSSI         | -1.55        | 0.65                 | 1.81           |
| <b>YLR319C</b> | <b>BUD6</b>  | <b>327</b>    | <b>IDDVSKAS#PLAKTPL</b>  | <b>-1.17</b> | <b>0.61</b>          | <b>0.66</b>    |
| YLR353W        | BUD8         | 413           | YEGHKTPS#PLTKMNK         | -3.22        | 0.80                 | 0.49           |
| YLR353W        | BUD8         | 411           | SRYEGHKT#PSPLTKM         | -3.22        | 0.63                 | 0.49           |
| YDL099W        | BUG1         | 277           | AARNTTAT#PIQFADF         | -1.06        | 0.92                 | 0.43           |
| YKL005C        | BYE1         | 177           | DVFLDEES#PRKRKRS         | -1.36        | 0.93                 | 1.39           |
| YNL278W        | CAF120       | 556           | FASSVND#PSDRAKS          | -2.42        | 0.79                 | 2.23           |
| YNL278W        | CAF120       | 510           | SPSIKRS#PPLVISE          | -2.02        | 0.88                 | 2.23           |
| YNL278W        | CAF120       | 518           | PPLVISES#PHKVHTP         | -2.02        | 0.70                 | 2.23           |
| YNL278W        | CAF120       | 871           | VQPANINS#PNKMYGA         | -1.24        | 0.61                 | 2.23           |
| YNL278W        | CAF120       | 577           | NNDRKATT#PEKFERG         | -1.11        | 0.95                 | 2.23           |
| YNL161W        | CBK1         | 93            | PALNYPAT#PPPHNNY         | -1.99        | 2.09                 | 0.52           |
| YNL161W        | CBK1         | 109           | ASNQMINT#PPPSMGG         | -1.99        | 0.65                 | 0.52           |
| YFR028C        | CDC14        | 429           | SSAVPQTS#PGQPRKG         | -1.42        | 3.07                 | 1.45           |
| <b>YAL038W</b> | <b>CDC19</b> | <b>407</b>    | <b>VLSTSGTT#PRLVSKY</b>  | <b>-1.89</b> | <b>1.23</b>          | <b>0.43</b>    |
| <b>YLR314C</b> | <b>CDC3</b>  | <b>503</b>    | <b>ELSINSAS#PNVNHSP</b>  | <b>-2.24</b> | <b>0.63</b>          | <b>0.43</b>    |
| <b>YLR314C</b> | <b>CDC3</b>  | <b>509</b>    | <b>ASPNVNH#PVPTKKK</b>   | <b>-1.67</b> | <b>1.25</b>          | <b>0.43</b>    |
| <b>YMR001C</b> | <b>CDC5</b>  | <b>70</b>     | <b>KLSALCKT#PPSLIKT</b>  | <b>-2.83</b> | <b>2.04</b>          | <b>0.43</b>    |
| YPR019W        | CDC54        | 69            | IRAAIGSS#PLNFPSS         | -1.07        | 2.46                 | 0.64           |
| YJL194W        | CDC6         | 368           | NSAQVPLT#PTTSPVK         | -2.53        | 0.65                 | 1.34           |
| YJL194W        | CDC6         | 372           | VPLTPTTS#PVKKSYP         | -2.53        | 0.65                 | 1.34           |
| <b>YPL160W</b> | <b>CDC60</b> | <b>142</b>    | <b>EEEIKEET#PAEKDHE</b>  | <b>-1.52</b> | <b>0.63</b>          | <b>0.43</b>    |
| YGL003C        | CDH1         | 227           | SQFFDSMS#PVRPDSK         | -3.18        | 2.91                 | 2.53           |
| YBR038W        | CHS2         | 86            | YRDSAHNS#PVAPNRY         | -3.58        | 1.08                 | 0.43           |
| YBR038W        | CHS2         | 60            | VFQGLPAS#PSRAALR         | -2.61        | 1.08                 | 0.43           |
| YBR038W        | CHS2         | 133           | PVDPYHLS#PQQQPSN         | -2.57        | 0.65                 | 0.43           |
| YBR038W        | CHS2         | 100           | YAANLQES#PKRAGEA         | -1.53        | 1.46                 | 0.43           |
| YNL298W        | CLA4         | 445           | PRYAQNSS#PTAAHFQ         | -1.18        | 0.73                 | 1.19           |
| YNL225C        | CNM67        | 121           | VPNFHST#PRENSSK          | -1.16        | 0.65                 | 0.43           |
| YPR030W        | CSR2         | 963           | EATSVSAS#PRSSVSY         | -1.07        | 1.02                 | 0.85           |
| <b>YOR042W</b> | <b>CUE5</b>  | <b>364</b>    | <b>AETTYIDT#PDTETKK</b>  | <b>-1.68</b> | <b>1.44</b>          | <b>0.43</b>    |
| YIR023W        | DAL81        | 867           | SQSSPNVT#PSHMSRH         | -1.47        | 0.94                 | 1.28           |
| YGR092W        | DBF2         | 53            | AGINDSPS#PVKPSFF         | -1.70        | 2.66                 | 0.81           |
| YGR092W        | DBF2         | 51            | RPAGINDS#PSPVKPS         | -1.70        | 1.08                 | 0.81           |
| YGR092W        | DBF2         | 83            | PDMDVSNS#PKKLPPK         | -1.70        | 0.84                 | 0.81           |
| YDR052C        | DBF4         | 11            | PTKMIIRS#PLKETDT         | -3.93        | 1.38                 | 0.43           |
| YHR164C        | DNA2         | 237           | KFSDLPSS#PIKAPNV         | -1.57        | 0.65                 | 0.73           |
| YER088C        | DOT6         | 487           | SSDADMLS#PTHSPQK         | -2.06        | 0.93                 | 1.80           |
| <b>YER088C</b> | <b>DOT6</b>  | <b>491</b>    | <b>DMLSPTS#PQKTL SK</b>  | <b>-2.00</b> | <b>0.95</b>          | <b>1.80</b>    |
| YBL101C        | ECM21        | 1028          | NLDKLLST#PSPVNRS         | -1.89        | 0.96                 | 1.07           |
| <b>YBL101C</b> | <b>ECM21</b> | <b>1030</b>   | <b>DKLLSTPS#PVNRSHN</b>  | <b>-1.89</b> | <b>0.91</b>          | <b>1.07</b>    |
| YBL101C        | ECM21        | 33            | KGQPFQPS#PTKKLGS         | -1.58        | 0.65                 | 1.07           |
| YJL201W        | ECM25        | 422           | TPVALQNT#PVLKPKS         | -1.38        | 0.95                 | 0.69           |
| YJL201W        | ECM25        | 411           | SPQRSVTS#PTYTPVA         | -1.38        | 0.75                 | 0.69           |
| YBL047C        | EDE1         | 238           | VNQPNRRT#PLSANST         | -1.81        | 0.67                 | 1.80           |
| YNL230C        | ELA1         | 235           | QAGGQSSS#PKKGPLS         | -1.03        | 0.61                 | 0.43           |
| <b>YMR219W</b> | <b>ESC1</b>  | <b>1145</b>   | <b>DRSNIFSS#PIRVIGA</b>  | <b>-1.69</b> | <b>0.63</b>          | <b>0.43</b>    |



| ORF            | SGDB name    | Site position | Context                 | log2 (H/L)   | age precise position | age enrichment |
|----------------|--------------|---------------|-------------------------|--------------|----------------------|----------------|
| YBR102C        | EXO84        | 31            | AKQKTPPS#PAKPKQK        | -1.82        | 0.92                 | 0.43           |
| YBR102C        | EXO84        | 28            | SSPAKQKT#PPSPAKP        | -1.82        | 0.61                 | 0.43           |
| YFR019W        | FAB1         | 183           | MQNSYART#PDSHDHDD       | -1.15        | 0.70                 | 0.49           |
| YJL157C        | FAR1         | 15            | SFEKKIHT#PPSGDRD        | -2.05        | 1.35                 | 1.03           |
| YJL157C        | FAR1         | 8             | MKT#PTRVSFE             | -1.38        | 1.20                 | 1.03           |
| YDR130C        | FIN1         | 74            | VTPRRIMS#PECLKGY        | -3.11        | 1.08                 | 0.88           |
| YDR130C        | FIN1         | 36            | VFVRLSMS#PLRTTSQ        | -2.23        | 1.19                 | 0.88           |
| YER032W        | FIR1         | 375           | PDLEHMKS#PPSTGLN        | -2.40        | 0.77                 | 1.05           |
| YER032W        | FIR1         | 84            | PNEISQDS#PLKIVFP        | -2.05        | 0.93                 | 1.05           |
| YER032W        | FIR1         | 225           | NLYLTPES#PLNRYHL        | -1.52        | 1.02                 | 1.05           |
| YER032W        | FIR1         | 399           | EPSEPTS#PTRQVNP         | -1.46        | 0.60                 | 1.05           |
| YNL068C        | FKH2         | 708           | GSANRARS#PLHSNSN        | -1.69        | 1.94                 | 2.34           |
| <b>YNL068C</b> | <b>FKH2</b>  | <b>833</b>    | <b>ETKDINSS#PLKNQGG</b> | <b>-1.51</b> | <b>0.60</b>          | <b>2.34</b>    |
| YPL221W        | FLC1         | 714           | SPDRASSS#PNSKSYP        | -1.10        | 0.84                 | 0.43           |
| <b>YAL035W</b> | <b>FUN12</b> | <b>386</b>    | <b>AKSTPAAT#PAATPTP</b> | <b>-1.07</b> | <b>0.63</b>          | <b>0.43</b>    |
| YAL034C        | FUN19        | 211           | RLPSPLAS#PNLNRQA        | -2.52        | 0.65                 | 1.38           |
| YAL034C        | FUN19        | 207           | SSSSRLPS#PLASPNL        | -2.52        | 0.65                 | 1.38           |
| <b>YOR178C</b> | <b>GAC1</b>  | <b>66</b>     | <b>KSEIFCTS#PEKNVRF</b> | <b>-1.70</b> | <b>0.64</b>          | <b>1.49</b>    |
| YOL051W        | GAL11        | 163           | QQQRRQLT#PQQQQLV        | -1.24        | 0.74                 | 1.37           |
| YPL248C        | GAL4         | 703           | SPGSVGPS#PVPLKSG        | -1.02        | 0.65                 | 0.62           |
| <b>YDL226C</b> | <b>GCS1</b>  | <b>170</b>    | <b>LENRRSAT#PANSSNG</b> | <b>-4.40</b> | <b>1.11</b>          | <b>0.43</b>    |
| <b>YDL226C</b> | <b>GCS1</b>  | <b>161</b>    | <b>VAQSREGT#PLENRRS</b> | <b>-1.32</b> | <b>1.89</b>          | <b>0.43</b>    |
| YMR255W        | GFD1         | 111           | EISPPPVS#PSKMKT         | -1.87        | 0.65                 | 0.44           |
| YMR255W        | GFD1         | 106           | SQKATEIS#PPPVSPS        | -1.43        | 0.60                 | 0.44           |
| <b>YDR309C</b> | <b>GIC2</b>  | <b>337</b>    | <b>AFFPSRQS#PLPKRRN</b> | <b>-3.37</b> | <b>0.79</b>          | <b>0.85</b>    |
| YDR507C        | GIN4         | 462           | IVNQSSPT#PASRNKR        | -3.48        | 0.65                 | 0.43           |
| YDR507C        | GIN4         | 435           | ASSSNLTT#PGSSKRL        | -2.46        | 0.76                 | 0.43           |
| YDR507C        | GIN4         | 460           | STIVNQSS#PTPASRN        | -1.74        | 0.87                 | 0.43           |
| YER054C        | GIP2         | 213           | GVQARDGS#PMLIRSK        | -1.18        | 0.65                 | 1.26           |
| <b>YAL031C</b> | <b>GIP4</b>  | <b>520</b>    | <b>ETKKSIVS#PEKRKLI</b> | <b>-1.00</b> | <b>0.65</b>          | <b>0.69</b>    |
| <b>YDR096W</b> | <b>GIS1</b>  | <b>696</b>    | <b>ISREASKS#PISSFVN</b> | <b>-2.86</b> | <b>0.60</b>          | <b>0.99</b>    |
| YDR096W        | GIS1         | 425           | TTISRISS#PLLSRMM        | -1.43        | 0.73                 | 0.99           |
| <b>YLR258W</b> | <b>GSY2</b>  | <b>655</b>    | <b>RPLSVPGS#PRDLRSN</b> | <b>-1.65</b> | <b>2.96</b>          | <b>0.43</b>    |
| <b>YMR192W</b> | <b>GYL1</b>  | <b>17</b>     | <b>ERIEVPRT#PHQTQPE</b> | <b>-2.35</b> | <b>0.76</b>          | <b>0.57</b>    |
| YOR070C        | GYP1         | 546           | TPTKDFQS#PTTALSN        | -3.64        | 0.84                 | 0.78           |
| YOR070C        | GYP1         | 539           | PRVASFVT#PTKDFQS        | -3.64        | 0.84                 | 0.78           |
| YOR070C        | GYP1         | 555           | TTALSNMT#PNNAVED        | -2.71        | 0.60                 | 0.78           |
| YDL234C        | GYP7         | 265           | DSWLTNNS#PIQKSQI        | -1.18        | 0.56                 | 0.43           |
| YJL165C        | HAL5         | 64            | IITSNVSS#PSISPVH        | -1.58        | 0.80                 | 0.46           |
| YOR358W        | HAP5         | 8             | MTDRNFS#PQQGQGP         | -1.03        | 0.72                 | 0.43           |
| YDL223C        | HBT1         | 671           | KQDEDEPLS#PRQTTNR       | -1.35        | 0.56                 | 0.43           |
| YDR458C        | HEH2         | 123           | MQIQEEKS#PKKKRKK        | -1.53        | 1.97                 | 1.70           |
| <b>YIL112W</b> | <b>HOS4</b>  | <b>690</b>    | <b>KKREKTQS#PILASRR</b> | <b>-3.73</b> | <b>0.65</b>          | <b>1.48</b>    |
| <b>YIL112W</b> | <b>HOS4</b>  | <b>290</b>    | <b>NLSNMNNS#PAQNPKR</b> | <b>-2.89</b> | <b>0.79</b>          | <b>1.48</b>    |
| YOL123W        | HRP1         | 462           | TSNTDSGS#PPLNLPN        | -1.02        | 0.91                 | 0.43           |
| YKL101W        | HSL1         | 1220          | ILSKLRLS#PENPSNT        | -2.90        | 1.08                 | 0.54           |
| YHR094C        | HXT1         | 31            | GRSKAMNT#PEGKNES        | -2.04        | 0.67                 | 0.43           |
| <b>YJL146W</b> | <b>IDS2</b>  | <b>130</b>    | <b>PEPSEAS#PIRQPSV</b>  | <b>-1.10</b> | <b>0.65</b>          | <b>0.43</b>    |
| YHR132W-A      | IGO2         | 128           | SSGPPPRS#PNK            | -2.83        | 1.27                 | 0.43           |
| YNL106C        | INP52        | 1016          | EISIVSVS#PRKGESN        | -4.31        | 0.81                 | 0.43           |
| YNL106C        | INP52        | 1005          | EPSSKLLS#PTKEISI        | -4.31        | 0.59                 | 0.43           |
| <b>YOR109W</b> | <b>INP53</b> | <b>986</b>    | <b>PSTSKEKS#PTPQTST</b> | <b>-4.34</b> | <b>0.51</b>          | <b>0.43</b>    |
| YOR109W        | INP53        | 988           | TSKEKSPT#PQTSTAS        | -2.25        | 1.46                 | 0.43           |
| <b>YPL209C</b> | <b>IPL1</b>  | <b>76</b>     | <b>MESSKIPS#PIRKATS</b> | <b>-2.10</b> | <b>1.23</b>          | <b>0.68</b>    |
| YPL242C        | IQG1         | 49            | NSSLNIAS#PSHLKTK        | -5.16        | 1.10                 | 0.88           |
| YPL242C        | IQG1         | 365           | NKSLSYYS#PTISKYL        | -3.41        | 1.13                 | 0.88           |
| YPL242C        | IQG1         | 354           | PTPSLEYS#PIKNKSL        | -2.71        | 0.82                 | 0.88           |

| ORF            | SGDB name   | Site position | Context                 | log2 (H/L)   | age precise position | age enrichment |
|----------------|-------------|---------------|-------------------------|--------------|----------------------|----------------|
| YPL242C        | IQG1        | 315           | NCSDFSNT#PSPYNEA        | -1.80        | 0.63                 | 0.88           |
| YPL242C        | IQG1        | 404           | KYSPSHYS#PMRRERM        | -1.70        | 1.05                 | 0.88           |
| YPL242C        | IQG1        | 268           | NINTAPAS#PEEPKEK        | -1.26        | 0.80                 | 0.88           |
| YPL242C        | IQG1        | 317           | SDFSNTPS#PYNEAPK        | -1.14        | 0.67                 | 0.88           |
| <b>YBR245C</b> | <b>ISW1</b> | <b>694</b>    | <b>TSTGSAGT#PEPGSGE</b> | <b>-2.32</b> | <b>1.11</b>          | <b>0.43</b>    |
| <b>YOR304W</b> | <b>ISW2</b> | <b>1079</b>   | <b>TSATREDT#PLSQNES</b> | <b>-3.00</b> | <b>0.74</b>          | <b>0.43</b>    |
| YPR141C        | KAR3        | 21            | TQHLSTPS#PKNDILA        | -2.64        | 1.01                 | 0.43           |
| YPL269W        | KAR9        | 632           | TPLSQLLS#PREGRLD        | -1.11        | 0.93                 | 0.92           |
| YPL269W        | KAR9        | 496           | NPFFDPES#PNKGKLI        | -1.11        | 0.75                 | 0.92           |
| YHR158C        | KEL1        | 613           | ANQIKNNS#PILETLP        | -3.02        | 2.21                 | 1.64           |
| YHR158C        | KEL1        | 503           | APLASAPS#PAPKDFS        | -2.93        | 0.89                 | 1.64           |
| YHR158C        | KEL1        | 67            | SNVNKTSS#PPMFARK        | -1.60        | 1.18                 | 1.64           |
| YHR158C        | KEL1        | 689           | GVAQMASS#PSKDQFK        | -1.16        | 0.87                 | 1.64           |
| <b>YHR102W</b> | <b>KIC1</b> | <b>735</b>    | <b>PLFGVGTS#PNRKPAK</b> | <b>-2.07</b> | <b>0.74</b>          | <b>0.79</b>    |
| YLR096W        | KIN2        | 24            | TSKGGSLs#PTPEAFN        | -3.37        | 1.01                 | 1.31           |
| <b>YLR096W</b> | <b>KIN2</b> | <b>609</b>    | <b>IPEQAHTS#PTSRKSS</b> | <b>-1.59</b> | <b>1.02</b>          | <b>1.31</b>    |
| YLR096W        | KIN2        | 643           | EYQQRSAS#PVVGEHQ        | -1.09        | 0.86                 | 1.31           |
| YOR233W        | KIN4        | 460           | GLVTIPGS#PTTARTR        | -2.37        | 0.77                 | 1.32           |
| YKL168C        | KKQ8        | 37            | PPRSRDSS#PINVTRI        | -2.07        | 0.65                 | 0.50           |
| YJR070C        | LIA1        | 281           | EALGAIAS#PEVVDVL        | -1.28        | 0.75                 | 0.43           |
| YGL090W        | LIF1        | 261           | KPISELNS#PGKRMKR        | -1.98        | 0.84                 | 0.43           |
| YDR439W        | LRS4        | 146           | KPTIHLLS#PIVNRDK        | -3.40        | 0.98                 | 0.43           |
| YDR439W        | LRS4        | 230           | RLSALQKS#PELRKER        | -2.94        | 0.51                 | 0.43           |
| YAL024C        | LTE1        | 212           | YARQSFAS#PDFRNQS        | -4.00        | 0.91                 | 2.06           |
| YAL024C        | LTE1        | 614           | SEAITNMT#PRRKNHS        | -2.33        | 0.81                 | 2.06           |
| YDL182W        | LYS20       | 396           | NFHAEVST#PQVLSAK        | -1.25        | 1.22                 | 0.43           |
| YDL131W        | LYS21       | 410           | DFHAELST#PLLKPVN        | -1.00        | 1.25                 | 0.43           |
| YJL013C        | MAD3        | 478           | AVKPRQLT#PILEMRE        | -2.92        | 0.75                 | 0.55           |
| YKL093W        | MBR1        | 69            | FNFPDSS#PCNAKCCQ        | -2.59        | 0.65                 | 0.43           |
| <b>YEL032W</b> | <b>MCM3</b> | <b>781</b>    | <b>QPASNSGS#PIKSTPR</b> | <b>-1.90</b> | <b>0.75</b>          | <b>0.43</b>    |
| YGL197W        | MDS3        | 1387          | KSSAFPQS#PIRAYGS        | -2.90        | 0.84                 | 1.03           |
| <b>YGL197W</b> | <b>MDS3</b> | <b>693</b>    | <b>EDDEDVVS#PKPVSKS</b> | <b>-1.08</b> | <b>0.65</b>          | <b>1.03</b>    |
| YOR174W        | MED4        | 237           | QMAKKEGT#PKTDSFI        | -1.09        | 0.63                 | 0.43           |
| YIL046W        | MET30       | 67            | KMTMATRS#PSSSPDL        | -1.27        | 0.68                 | 0.43           |
| YGL035C        | MIG1        | 264           | QQQQNSLS#PRYSNTV        | -2.20        | 0.88                 | 2.24           |
| YMR036C        | MIH1        | 27            | FQKISLKS#PFGKKN         | -4.30        | 0.83                 | 2.16           |
| YNL074C        | MLF3        | 297           | PATSPYVS#PQQSARQ        | -2.97        | 1.18                 | 1.07           |
| <b>YNL074C</b> | <b>MLF3</b> | <b>79</b>     | <b>KNSNNVSS#PLDNVIP</b> | <b>-2.18</b> | <b>0.65</b>          | <b>1.07</b>    |
| YNL074C        | MLF3        | 56            | FYNLQTTIS#PIPISGS       | -1.94        | 0.65                 | 1.07           |
| YNL074C        | MLF3        | 265           | CPFILKRS#PPQAYSS        | -1.77        | 0.56                 | 1.07           |
| <b>YNL074C</b> | <b>MLF3</b> | <b>183</b>    | <b>SSESSPAS#PDLKLSR</b> | <b>-1.68</b> | <b>0.65</b>          | <b>1.07</b>    |
| YNL074C        | MLF3        | 180           | TLPSSSESS#PASPDLK       | -1.60        | 0.65                 | 1.07           |
| YLL061W        | MMP1        | 21            | FSTSVLST#PSNEGNN        | -3.83        | 0.63                 | 0.43           |
| YLR190W        | MMR1        | 37            | SFQNLLNS#PTKCLKLD       | -1.11        | 0.83                 | 0.51           |
| <b>YIL106W</b> | <b>MOB1</b> | <b>80</b>     | <b>ESDHGRMS#PVLTPK</b>  | <b>-4.65</b> | <b>0.65</b>          | <b>0.44</b>    |
| <b>YIL106W</b> | <b>MOB1</b> | <b>36</b>     | <b>ANNAGSVS#PTKATPH</b> | <b>-1.20</b> | <b>1.07</b>          | <b>0.44</b>    |
| YFL034C-B      | MOB2        | 76            | SQQLTSTT#PQSQQQE        | -1.03        | 1.02                 | 0.74           |
| YPL082C        | MOT1        | 791           | SFVSEIFS#PVMNKQL        | -2.30        | 0.65                 | 0.43           |
| YLR219W        | MSC3        | 46            | ASAASAAS#PDRTNYS        | -1.13        | 0.65                 | 0.63           |
| <b>YDR097C</b> | <b>MSH6</b> | <b>228</b>    | <b>YNTSHSSS#PFTRNIS</b> | <b>-1.84</b> | <b>1.18</b>          | <b>0.43</b>    |
| <b>YLR116W</b> | <b>MSL5</b> | <b>378</b>    | <b>SRYAPSPS#PPASHIS</b> | <b>-1.21</b> | <b>1.06</b>          | <b>0.71</b>    |
| YLR116W        | MSL5        | 376           | ASSRYAPS#PSPPASH        | -1.21        | 0.74                 | 0.71           |
| YKL062W        | MSN4        | 178           | FNENIELS#PHQHATS        | -1.58        | 0.79                 | 1.42           |
| YKL062W        | MSN4        | 161           | EQLEKVFS#PMNPIND        | -1.58        | 0.65                 | 1.42           |
| YAR033W        | MST28       | 179           | TATSIGNS#PVTAKPE        | -1.19        | 0.51                 | 0.43           |
| <b>YPL070W</b> | <b>MUK1</b> | <b>245</b>    | <b>IVGTSVSS#PNKMKTF</b> | <b>-2.42</b> | <b>0.99</b>          | <b>0.43</b>    |
| YPL070W        | MUK1        | 67            | ERLENNKS#PILTKQE        | -1.10        | 0.73                 | 0.43           |

| ORF            | SGDB name    | Site position | Context                 | log2 (H/L)   | age precise position | age enrichment |
|----------------|--------------|---------------|-------------------------|--------------|----------------------|----------------|
| YLR457C        | NBP1         | 253           | LKIDLSPS#PIRRTNS        | -1.04        | 1.12                 | 0.56           |
| YLR457C        | NBP1         | 251           | KPLKIDLS#PSPIRRT        | -1.04        | 0.94                 | 0.56           |
| <b>YBL024W</b> | <b>NCL1</b>  | <b>426</b>    | <b>TEKLSSET#PALESEG</b> | <b>-1.76</b> | <b>0.75</b>          | <b>0.43</b>    |
| YJL076W        | NET1         | 676           | RNILPQRT#PRSAAKR        | -4.43        | 0.84                 | 1.05           |
| YJL076W        | NET1         | 1056          | TQLMDMSS#PPSVKSK        | -3.50        | 1.12                 | 1.05           |
| YJL076W        | NET1         | 1042          | VNKKINAT#PDKIPVT        | -3.50        | 1.02                 | 1.05           |
| <b>YJL076W</b> | <b>NET1</b>  | <b>1032</b>   | <b>SSKIEAPS#PSVNKKI</b> | <b>-3.46</b> | <b>0.56</b>          | <b>1.05</b>    |
| YJL076W        | NET1         | 252           | PPPTQPQS#PPIRISS        | -2.69        | 1.10                 | 1.05           |
| YJL076W        | NET1         | 830           | SFPVVGGS#PSVATKG        | -2.49        | 0.64                 | 1.05           |
| YJL076W        | NET1         | 447           | SIADNNGS#PVKNSPL        | -2.23        | 1.18                 | 1.05           |
| YJL076W        | NET1         | 452           | NGSPVKNS#PLGDAMP        | -2.23        | 0.91                 | 1.05           |
| YJL076W        | NET1         | 166           | RSKLNNGS#PQSVQPQ        | -2.13        | 0.65                 | 1.05           |
| YJL076W        | NET1         | 297           | QQRLLSGT#PIMSTMT        | -1.81        | 1.18                 | 1.05           |
| YOR056C        | NOB1         | 367           | GNRYSVAS#PLSKNSQ        | -3.14        | 1.69                 | 0.58           |
| <b>YPR072W</b> | <b>NOT5</b>  | <b>306</b>    | <b>FDNSTLGT#PTTHVSM</b> | <b>-1.33</b> | <b>0.97</b>          | <b>0.55</b>    |
| YML059C        | NTE1         | 645           | RNAQLSTS#PLSLDNT        | -1.12        | 0.66                 | 0.44           |
| YDR001C        | NTH1         | 66            | MSVFDNVS#PFKKTGF        | -5.54        | 0.75                 | 0.43           |
| YOR098C        | NUP1         | 767           | HNKEKSN#PTSFFDG         | -1.13        | 0.89                 | 1.29           |
| YIL115C        | NUP159       | 854           | HVKAKSES#PFSAFAT        | -1.72        | 1.83                 | 2.37           |
| YIL115C        | NUP159       | 735           | FKFGTQAS#PFSSQLG        | -1.09        | 1.13                 | 2.37           |
| YAR002W        | NUP60        | 460           | VQPDLSVT#PQKSSSK        | -4.10        | 0.79                 | 1.02           |
| <b>YAR002W</b> | <b>NUP60</b> | <b>222</b>    | <b>FNYSLPS#PYKTTVY</b>  | <b>-2.35</b> | <b>1.65</b>          | <b>1.02</b>    |
| <b>YAR002W</b> | <b>NUP60</b> | <b>382</b>    | <b>NVVVAETS#PEKKDGG</b> | <b>-1.47</b> | <b>1.22</b>          | <b>1.02</b>    |
| YAR002W        | NUP60        | 312           | IRKHKRVS#PNAAPRQ        | -1.17        | 0.60                 | 1.02           |
| YHR195W        | NVJ1         | 298           | SLLHIQVS#PTKSSNL        | -1.06        | 0.65                 | 0.43           |
| YHL029C        | OCA5         | 8             | MHDKKS#PMANSHY          | -1.60        | 0.83                 | 0.58           |
| YBR060C        | ORC2         | 217           | LTLSRNFT#PTVPKN         | -1.30        | 0.87                 | 1.08           |
| YPR162C        | ORC4         | 9             | TISEARLS#PQVNLLP        | -1.51        | 0.56                 | 0.55           |
| <b>YHR118C</b> | <b>ORC6</b>  | <b>116</b>    | <b>KQFAWTPS#PKKNKRS</b> | <b>-1.12</b> | <b>1.58</b>          | <b>1.30</b>    |
| <b>YHR118C</b> | <b>ORC6</b>  | <b>114</b>    | <b>PMKQFAWT#PSPKKNK</b> | <b>-1.12</b> | <b>1.18</b>          | <b>1.30</b>    |
| YGR178C        | PBP1         | 193           | ERKLEKWT#PEEGAEH        | -4.18        | 1.35                 | 2.14           |
| <b>YGR178C</b> | <b>PBP1</b>  | <b>436</b>    | <b>TPSAKTVS#PTTQISA</b> | <b>-1.95</b> | <b>0.92</b>          | <b>2.14</b>    |
| YER149C        | PEA2         | 345           | PVTWDPSS#PSSVGSP        | -1.42        | 1.27                 | 0.60           |
| YML123C        | PHO84        | 579           | NNDIESSS#PSQLQHE        | -1.53        | 0.65                 | 0.43           |
| YLR273C        | PIG1         | 645           | FRDYFYKS#PSP            | -2.40        | 0.63                 | 0.99           |
| <b>YBL051C</b> | <b>PIN4</b>  | <b>541</b>    | <b>LLRNSQIS#PPNSQIP</b> | <b>-1.25</b> | <b>1.31</b>          | <b>0.89</b>    |
| <b>YBL051C</b> | <b>PIN4</b>  | <b>466</b>    | <b>SMQPTLTS#PKMNIHH</b> | <b>-1.01</b> | <b>0.79</b>          | <b>0.89</b>    |
| YIL122W        | POG1         | 168           | INASELAS#PRGHRRY        | -2.48        | 0.93                 | 0.43           |
| YNL102W        | POL1         | 215           | KYLEIESS#PLKLSQR        | -2.32        | 0.83                 | 0.43           |
| YNL102W        | POL1         | 313           | PFVTAPGT#PIGIKGL        | -2.02        | 2.07                 | 0.43           |
| YNL102W        | POL1         | 305           | SRSNPSTS#PFVTAPG        | -2.02        | 0.83                 | 0.43           |
| <b>YNL102W</b> | <b>POL1</b>  | <b>170</b>    | <b>LRENLNSS#PTSEFKS</b> | <b>-1.28</b> | <b>0.77</b>          | <b>0.43</b>    |
| YBL035C        | POL12        | 111           | FGLSIPKT#PTLKKRK        | -3.50        | 2.60                 | 0.65           |
| YLR018C        | POM34        | 221           | YLFKGLT#PLKARQR         | -1.68        | 1.18                 | 0.85           |
| <b>YLR018C</b> | <b>POM34</b> | <b>273</b>    | <b>NDNNSPHT#PVTRKGY</b> | <b>-1.13</b> | <b>0.65</b>          | <b>0.85</b>    |
| YIL114C        | POR2         | 103           | GDVNAFLT#PQSIKNA        | -3.59        | 0.88                 | 0.43           |
| <b>YML016C</b> | <b>PPZ1</b>  | <b>265</b>    | <b>AYSTPLNS#PGLSKLT</b> | <b>-1.83</b> | <b>1.21</b>          | <b>0.65</b>    |
| YML016C        | PPZ1         | 261           | DGNTAYST#PLNSPGL        | -1.59        | 1.39                 | 0.65           |
| YML016C        | PPZ1         | 142           | MIQMEPKS#PILKTNN        | -1.54        | 2.41                 | 0.65           |
| YDR436W        | PPZ2         | 299           | NVNGRGTS#PIPNLNI        | -2.54        | 1.18                 | 0.74           |
| YDR436W        | PPZ2         | 310           | NLNIDKPS#PSASSAS        | -2.54        | 0.59                 | 0.74           |
| YMR137C        | PSO2         | 193           | SFISNPSS#PAKTKRD        | -2.99        | 0.64                 | 0.43           |
| YML017W        | PSP2         | 340           | TPLSKLDS#PALELQS        | -1.19        | 0.75                 | 0.46           |
| <b>YBL046W</b> | <b>PSY4</b>  | <b>434</b>    | <b>TYRENISS#PLGKKS</b>  | <b>-2.48</b> | <b>1.02</b>          | <b>0.43</b>    |
| YBL046W        | PSY4         | 347           | FTNMDLTT#PKKYKHT        | -1.83        | 1.02                 | 0.43           |
| YJR059W        | PTK2         | 784           | NSLRSLGS#PSVSSSK        | -2.44        | 0.65                 | 2.12           |
| YJR059W        | PTK2         | 69            | GSGSGGNS#PSSSAGA        | -1.92        | 0.96                 | 2.12           |

| ORF     | SGDB name | Site position | Context           | log2 (H/L) | age precise position | age enrichment |
|---------|-----------|---------------|-------------------|------------|----------------------|----------------|
| YJR059W | PTK2      | 727           | LKSMLNST#PTTPHN   | -1.25      | 0.86                 | 2.12           |
| YJR059W | PTK2      | 730           | MLNSTPTT#PTHNGPT  | -1.25      | 0.73                 | 2.12           |
| YJR059W | PTK2      | 737           | TPTHNGPT#PLPAKAG  | -1.08      | 0.65                 | 2.12           |
| YER075C | PTP3      | 272           | TATTPLESS#PQMNLKL | -2.45      | 0.65                 | 1.14           |
| YGR253C | PUP2      | 56            | GVEKRATS#PLLESDS  | -3.33      | 1.35                 | 0.43           |
| YDR217C | RAD9      | 26            | AIKEALHS#PLADGDM  | -1.43      | 0.63                 | 1.44           |
| YDR217C | RAD9      | 937           | KSMTNVLS#PKKHTDD  | -1.21      | 0.63                 | 1.44           |
| YDR217C | RAD9      | 56            | STNIEGS#PKANPNP   | -1.15      | 1.07                 | 1.44           |
| YJR033C | RAV1      | 1211          | PVQKLLKS#PTKDRAY  | -1.08      | 0.63                 | 0.43           |
| YLR248W | RCK2      | 46            | DVSQITSS#PKKSFQD  | -1.26      | 0.51                 | 0.43           |
| YDR195W | REF2      | 245           | DDKNSSPS#PTASTSS  | -1.67      | 0.61                 | 0.43           |
| YDR028C | REG1      | 898           | RIVNNTPS#PAEVGAS  | -1.47      | 0.74                 | 1.73           |
| YDR028C | REG1      | 896           | SFRIVNNT#PSPAEVG  | -1.47      | 0.63                 | 1.73           |
| YDR028C | REG1      | 421           | NLDQNLNS#PDNRRFP  | -1.10      | 0.60                 | 1.73           |
| YOR217W | RFC1      | 48            | DQESTNKT#PKKMPVS  | -2.12      | 0.56                 | 0.43           |
| YOR127W | RGA1      | 278           | SRNLLNKT#PLRNSSG  | -4.58      | 1.73                 | 1.92           |
| YOR127W | RGA1      | 331           | LLTSVLHS#PVSVNMK  | -3.28      | 1.27                 | 1.92           |
| YOR127W | RGA1      | 291           | SGQYLAKS#PSSYRQG  | -2.53      | 1.69                 | 1.92           |
| YDR379W | RGA2      | 772           | GKVPLSPS#PKRLDYT  | -2.84      | 0.77                 | 1.92           |
| YDR379W | RGA2      | 763           | RVHDELPS#PGKVPLS  | -2.84      | 0.65                 | 1.92           |
| YDR379W | RGA2      | 770           | SPGKVPLS#PSPKRLD  | -2.84      | 0.65                 | 1.92           |
| YDR379W | RGA2      | 380           | SKSMNHVS#PITRTDT  | -1.48      | 0.60                 | 1.92           |
| YDR379W | RGA2      | 733           | DLESQQRS#PNSSSSGG | -1.34      | 0.75                 | 1.92           |
| YDR137W | RGP1      | 370           | SSIIDIDS#PLEDNEF  | -1.31      | 0.56                 | 0.83           |
| YKL038W | RGT1      | 229           | SYNTVQQS#PITNKHT  | -2.04      | 1.16                 | 0.96           |
| YKL038W | RGT1      | 469           | EASSPGST#PQRSTKK  | -1.85      | 1.05                 | 0.96           |
| YBR275C | RIF1      | 45            | KTNLPPPS#PQAHMHI  | -1.75      | 0.63                 | 0.91           |
| YFL033C | RIM15     | 1565          | PTMTKFKS#PLSPANT  | -1.55      | 1.30                 | 3.06           |
| YPR018W | RLF2      | 94            | KLLCYKNS#PIQSTKY  | -2.47      | 0.83                 | 0.54           |
| YPR018W | RLF2      | 515           | QTASQSQS#PEKKQKA  | -1.54      | 1.52                 | 0.54           |
| YLR371W | ROM2      | 171           | DHPLPPMS#PRNEVYQ  | -1.97      | 0.79                 | 0.43           |
| YLR371W | ROM2      | 216           | STGSASTT#PTQARKS  | -1.10      | 0.92                 | 0.43           |
| YER169W | RPH1      | 575           | SLIKRVKS#PNIVTLN  | -3.39      | 1.18                 | 1.15           |
| YER169W | RPH1      | 561           | ISHSAPHS#PVNPNIS  | -1.38      | 0.77                 | 1.15           |
| YER169W | RPH1      | 430           | SKSSGVSS#PLLSRMK  | -1.08      | 1.18                 | 1.15           |
| YDR418W | RPL12B    | 38            | KIGPLGLS#PKKVGED  | -2.25      | 2.73                 | 0.43           |
| YIL153W | RRD1      | 341           | IEQANAGS#PGREQTS  | -2.00      | 0.60                 | 0.52           |
| YLR357W | RSC2      | 682           | IPLSRVGS#PGAGGPL  | -2.69      | 1.09                 | 0.94           |
| YLR357W | RSC2      | 243           | LRDNRSTT#PSHSGTP  | -1.25      | 0.73                 | 0.94           |
| YOR014W | RTS1      | 242           | HSFERLPT#PTKLNPD  | -3.54      | 1.45                 | 1.12           |
| YDR159W | SAC3      | 866           | SDKNLIFS#PVNDEFN  | -2.76      | 0.74                 | 0.87           |
| YDR159W | SAC3      | 600           | VKPQINTS#PKRVATR  | -1.27      | 0.66                 | 0.87           |
| YDR389W | SAC7      | 46            | ENITVPRS#PTSLSRN  | -1.92      | 0.65                 | 2.11           |
| YDR389W | SAC7      | 16            | GSKIENVS#PSKGVHP  | -1.49      | 0.80                 | 2.11           |
| YER129W | SAK1      | 966           | KLSELSNS#PQKGSNN  | -1.63      | 0.56                 | 1.41           |
| YER129W | SAK1      | 36            | SSSVSLRS#PTKSSAT  | -1.47      | 0.65                 | 1.41           |
| YER120W | SCS2      | 204           | EKQTSNST#PAPQNQI  | -1.76      | 0.56                 | 0.43           |
| YGL056C | SDS23     | 405           | SSSPST#PPVTTLP    | -1.32      | 0.60                 | 0.92           |
| YBR214W | SDS24     | 458           | TAMEDPPS#PRSSAIA  | -1.30      | 0.86                 | 0.86           |
| YLR166C | SEC10     | 485           | NVDAFMHS#PRGNTHS  | -1.44      | 0.60                 | 0.43           |
| YPL085W | SEC16     | 607           | VSVPNIVS#PKPPVVK  | -2.34      | 0.76                 | 2.62           |
| YPL085W | SEC16     | 1515          | IGDSLQGS#PQRIHNT  | -1.43      | 0.65                 | 2.62           |
| YDL195W | SEC31     | 836           | PSQPSMAS#PFVNKTN  | -1.23      | 0.91                 | 1.47           |
| YDL195W | SEC31     | 980           | PSSVSMVS#PPPLHKN  | -1.07      | 1.23                 | 1.47           |
| YDR170C | SEC7      | 1240          | DVWGKAT#PTELAQE   | -1.37      | 1.42                 | 0.43           |
| YOR057W | SGT1      | 171           | NSSHSPIS#PLKIETA  | -1.37      | 0.51                 | 0.43           |
| YBL058W | SHP1      | 315           | GQQQRLGS#PIGESS   | -1.29      | 2.61                 | 0.43           |

| ORF     | SGDB name | Site position | Context          | log2 (H/L) | age precise position | age enrichment |
|---------|-----------|---------------|------------------|------------|----------------------|----------------|
| YBL058W | SHP1      | 322           | SPIPGESS#PAEVPKN | -1.05      | 0.65                 | 0.43           |
| YDL225W | SHS1      | 447           | SSPKFLNS#PDLPERT | -2.11      | 0.79                 | 0.43           |
| YOL004W | SIN3      | 304           | DDPIRVTT#PMGTTTV | -1.62      | 2.72                 | 0.58           |
| YOL004W | SIN3      | 316           | TTVNNNIS#PSGRGTT | -1.62      | 0.56                 | 0.58           |
| YDR422C | SIP1      | 200           | SSATASPS#PTRSSSV | -1.06      | 0.75                 | 0.43           |
| YDR422C | SIP1      | 198           | LESSATAS#PSPTRSS | -1.06      | 0.65                 | 0.43           |
| YDL042C | SIR2      | 23            | NKVSNTVS#PTQDKDA | -1.13      | 0.56                 | 0.43           |
| YLR442C | SIR3      | 454           | HSMNENPT#PEKGNK  | -1.13      | 0.88                 | 0.64           |
| YDR227W | SIR4      | 389           | KRMEILKS#PHLSKSP | -2.96      | 0.56                 | 0.53           |
| YDR227W | SIR4      | 342           | TSKKIVPS#PKKVAID | -2.04      | 0.51                 | 0.53           |
| YKR072C | SIS2      | 47            | GKDSIINS#PVSGRQS | -1.70      | 0.63                 | 1.15           |
| YKR072C | SIS2      | 56            | VSGRQIS#PTLSNAT  | -1.33      | 0.65                 | 1.15           |
| YDR409W | SIZ1      | 139           | SPSVIRQS#PTQRRKT | -2.41      | 0.75                 | 1.67           |
| YDR409W | SIZ1      | 132           | PPTVQQQS#PSVIRQS | -2.41      | 0.66                 | 1.67           |
| YHR149C | SKG6      | 126           | LPTMKDYS#PGINHLY | -1.61      | 0.51                 | 0.43           |
| YHR149C | SKG6      | 232           | PDNFSNCT#PIRASSR | -1.61      | 0.60                 | 0.43           |
| YNL167C | SKO1      | 113           | IISPPILT#PGGSKRL | -1.81      | 1.65                 | 1.31           |
| YNL167C | SKO1      | 108           | QQRPTIIS#PPILTPG | -1.81      | 1.35                 | 1.31           |
| YNL167C | SKO1      | 94            | HNDVKKDS#PSFLPGQ | -1.43      | 0.91                 | 1.31           |
| YBL007C | SLA1      | 437           | IKKNFTKS#PSRSRSR | -2.93      | 0.77                 | 0.74           |
| YNL243W | SLA2      | 294           | PARTPART#PTPTPPV | -1.62      | 2.12                 | 0.43           |
| YNL243W | SLA2      | 308           | VVAEPAIS#PRPVSQR | -1.62      | 0.70                 | 0.43           |
| YNL243W | SLA2      | 298           | PARTPTPT#PPVVAEP | -1.13      | 0.60                 | 0.43           |
| YNL243W | SLA2      | 296           | RTPARTPT#PTPPVVA | -1.09      | 1.02                 | 0.43           |
| YGL113W | SLD3      | 467           | IINSVPSS#PALRRVD | -4.42      | 1.04                 | 0.80           |
| YDR515W | SLF1      | 42            | TSPWKSSS#PDSNTVI | -1.10      | 0.63                 | 0.43           |
| YBR156C | SLI15     | 268           | KVRTVKES#PIAFKKK | -3.00      | 0.81                 | 1.22           |
| YBR156C | SLI15     | 144           | SIHDTNKS#PVEPLNS | -1.04      | 0.65                 | 1.22           |
| YNL047C | SLM2      | 649           | FYIENVDS#PRKSNQL | -2.33      | 0.79                 | 0.51           |
| YLR086W | SMC4      | 128           | RLELLQLS#PVKNSRV | -2.92      | 1.53                 | 0.43           |
| YLR086W | SMC4      | 113           | YSQSPPRS#PGRSPTR | -1.98      | 2.01                 | 0.43           |
| YLR086W | SMC4      | 117           | PPRSPGRS#PTRRLEL | -1.98      | 1.40                 | 0.43           |
| YDR006C | SOK1      | 193           | NINNPSPS#PPPSSKQ | -1.24      | 0.65                 | 0.43           |
| YDR006C | SOK1      | 191           | YTNINNPS#SPPPPSS | -1.24      | 0.64                 | 0.43           |
| YLL021W | SPA2      | 1087          | SPELAKNS#PLAPIKK | -5.19      | 0.60                 | 1.29           |
| YLL021W | SPA2      | 585           | NDVEEEES#PVKPLKI | -3.34      | 1.18                 | 1.29           |
| YLL021W | SPA2      | 646           | EDNDKYVS#PIKAVTS | -2.55      | 0.72                 | 1.29           |
| YLL021W | SPA2      | 961           | TAQESIKS#PEARKL  | -2.54      | 0.51                 | 1.29           |
| YLL021W | SPA2      | 274           | KGPEQLKS#PEVQRAE | -2.09      | 0.65                 | 1.29           |
| YLL021W | SPA2      | 599           | ITQKAINS#PIIRPSS | -2.04      | 0.84                 | 1.29           |
| YLL021W | SPA2      | 254           | NYWDVNS#PIIKVDK  | -1.68      | 0.65                 | 1.29           |
| YLL021W | SPA2      | 937           | EADSRVES#PGMKEQI | -1.58      | 0.65                 | 1.29           |
| YLL021W | SPA2      | 979           | GEVDKIES#PRMVRES | -1.58      | 0.76                 | 1.29           |
| YLL021W | SPA2      | 1080          | EPNSQIVS#PELAKNS | -1.57      | 0.91                 | 1.29           |
| YLL021W | SPA2      | 883           | EPLGNVES#PDMTQKV | -1.44      | 0.60                 | 1.29           |
| YLL021W | SPA2      | 910           | ESDSRVES#PGMTGQI | -1.33      | 0.56                 | 1.29           |
| YGL093W | SPC105    | 356           | DYAASVTT#PVKEAKD | -1.10      | 0.79                 | 1.43           |
| YPL124W | SPC29     | 59            | RAQERMSS#PLHRLSP | -1.54      | 0.59                 | 0.43           |
| YKL042W | SPC42     | 357           | NMSETFAT#PTPNNR  | -1.23      | 1.18                 | 0.90           |
| YHR152W | SPO12     | 118           | QLQQRFAS#PTDRLVS | -5.07      | 0.93                 | 0.43           |
| YHR152W | SPO12     | 125           | SPTDRLVS#PCSLKLN | -5.07      | 0.93                 | 0.43           |
| YER161C | SPT2      | 173           | KRPQKKAS#PGATLRG | -1.18      | 0.77                 | 0.43           |
| YML034W | SRC1      | 241           | LGKLSVKT#PIKNTNR | -3.53      | 1.27                 | 1.61           |
| YML034W | SRC1      | 80            | KMDRPSSS#PSIASPR | -3.03      | 0.51                 | 1.61           |
| YML034W | SRC1      | 85            | SSSPSIAS#PRRSRRA | -2.60      | 0.51                 | 1.61           |
| YML034W | SRC1      | 291           | ANGTGHST#PLSKLV  | -2.19      | 0.67                 | 1.61           |
| YKR091W | SRL3      | 212           | RVDNVNVS#PLRWSSH | -2.87      | 0.80                 | 0.83           |



| ORF            | SGDB name    | Site position | Context                  | log2 (H/L)   | age precise position | age enrichment |
|----------------|--------------|---------------|--------------------------|--------------|----------------------|----------------|
| YCL037C        | SRO9         | 40            | PAPLPTSS#PWKLAPT         | -2.84        | 1.10                 | 0.52           |
| YDR293C        | SSD1         | 286           | QQPQQQLS#PFRHRGS         | -2.67        | 1.17                 | 0.43           |
| YDR293C        | SSD1         | 267           | KTRNNEYS#PGINSNW         | -2.52        | 0.75                 | 0.43           |
| YDR293C        | SSD1         | 231           | RRATSNLS#PPSFKFP         | -1.30        | 1.12                 | 0.43           |
| <b>YDR293C</b> | <b>SSD1</b>  | <b>492</b>    | <b>NDSDSLSS#PTKSGVR</b>  | <b>-1.03</b> | <b>0.84</b>          | <b>0.43</b>    |
| <b>YLR006C</b> | <b>SSK1</b>  | <b>195</b>    | <b>LLRFASVS#PYPKFHS</b>  | <b>-2.85</b> | <b>0.63</b>          | <b>2.57</b>    |
| YLR006C        | SSK1         | 673           | TDSVLVKS#PQKPIAP         | -1.43        | 0.83                 | 2.57           |
| <b>YNR031C</b> | <b>SSK2</b>  | <b>54</b>     | <b>TQARVASS#PISPGLH</b>  | <b>-2.48</b> | <b>0.91</b>          | <b>0.51</b>    |
| <b>YNR031C</b> | <b>SSK2</b>  | <b>57</b>     | <b>RVASSPIS#PGLHSTQ</b>  | <b>-2.48</b> | <b>0.79</b>          | <b>0.51</b>    |
| YDR443C        | SSN2         | 748           | NDIPQTES#PLKTVDS         | -4.10        | 1.01                 | 1.07           |
| YNL309W        | STB1         | 72            | KTLLEAIS#PAKKPLH         | -5.02        | 1.13                 | 1.13           |
| YNL309W        | STB1         | 89            | TNKMTVIS#PVKFVEK         | -3.35        | 0.79                 | 1.13           |
| YNL309W        | STB1         | 99            | KFVEKPNT#PPSSRQR         | -2.71        | 1.03                 | 1.13           |
| YFL026W        | STE2         | 382           | NQFYQLPT#PTSSKNT         | -1.15        | 0.92                 | 0.43           |
| YHL007C        | STE20        | 203           | STDIRRAT#PVSTPVI         | -2.47        | 0.60                 | 1.11           |
| YHL007C        | STE20        | 562           | TPQQVAQS#PKAPAQE         | -2.28        | 0.90                 | 1.11           |
| <b>YHL007C</b> | <b>STE20</b> | <b>502</b>    | <b>MNSAANVS#PLKQTHA</b>  | <b>-1.85</b> | <b>0.65</b>          | <b>1.11</b>    |
| YHL007C        | STE20        | 512           | KQTHAPTT#PNRTSPN         | -1.53        | 0.65                 | 1.11           |
| YHL007C        | STE20        | 517           | PTTPNRTS#PNRSSIS         | -1.11        | 0.60                 | 1.11           |
| YDR103W        | STE5         | 329           | SNYTFLHS#PLGHRRRI        | -2.83        | 0.65                 | 0.96           |
| <b>YGR008C</b> | <b>STF2</b>  | <b>28</b>     | <b>HTGNYGES#PNHIKKQ</b>  | <b>-1.50</b> | <b>1.04</b>          | <b>0.43</b>    |
| YDL048C        | STP4         | 191           | TTGFKTIT#PSPPTQH         | -1.40        | 0.73                 | 1.17           |
| YDL048C        | STP4         | 193           | GFKTITPS#PPTQHQS         | -1.40        | 0.73                 | 1.17           |
| <b>YDR310C</b> | <b>SUM1</b>  | <b>738</b>    | <b>QTENTSIS#PKKRTE</b>   | <b>-1.71</b> | <b>0.51</b>          | <b>0.53</b>    |
| YDR310C        | SUM1         | 379           | KFHQIPSS#PSNPVSQ         | -1.19        | 0.65                 | 0.53           |
| <b>YJL187C</b> | <b>SWE1</b>  | <b>373</b>    | <b>DTDEEIST#PTRRCSI</b>  | <b>-2.17</b> | <b>1.04</b>          | <b>2.89</b>    |
| <b>YJL187C</b> | <b>SWE1</b>  | <b>111</b>    | <b>DSRIKRWVS#PFHENES</b> | <b>-1.58</b> | <b>0.93</b>          | <b>2.89</b>    |
| YER111C        | SWI4         | 806           | PSKILENS#PILYRRR         | -3.48        | 0.77                 | 1.12           |
| YER111C        | SWI4         | 20            | NTNHQKIT#PISKSVL         | -3.22        | 0.65                 | 1.12           |
| <b>YDR146C</b> | <b>SWI5</b>  | <b>522</b>    | <b>INTYTTNS#PSKITRK</b>  | <b>-4.00</b> | <b>1.38</b>          | <b>2.61</b>    |
| <b>YDR146C</b> | <b>SWI5</b>  | <b>492</b>    | <b>FVISETPS#PVLKSQS</b>  | <b>-2.48</b> | <b>1.08</b>          | <b>2.61</b>    |
| YDR146C        | SWI5         | 300           | GFNDSLIS#PKKIRSN         | -2.41        | 0.80                 | 2.61           |
| YDR146C        | SWI5         | 261           | SNTSFTGS#PSRRNNR         | -2.14        | 1.50                 | 2.61           |
| YDR146C        | SWI5         | 250           | NSLSPMIS#PPMSNTS         | -2.14        | 0.71                 | 2.61           |
| YDR146C        | SWI5         | 664           | GTSSVSSS#PIKENIN         | -2.08        | 1.15                 | 2.61           |
| YDR146C        | SWI5         | 505           | QSKYEGRS#PQFGTHI         | -1.70        | 1.11                 | 2.61           |
| YDR146C        | SWI5         | 702           | NGTGIMVS#PMKTNQR         | -1.57        | 0.74                 | 2.61           |
| YPR095C        | SYT1         | 297           | AKNKPPLS#PSSFIRT         | -1.11        | 0.51                 | 1.45           |
| <b>YMR005W</b> | <b>TAF4</b>  | <b>36</b>     | <b>TKPAFNLS#PGKASEL</b>  | <b>-1.68</b> | <b>0.95</b>          | <b>0.43</b>    |
| <b>YMR005W</b> | <b>TAF4</b>  | <b>49</b>     | <b>ELSHSLPS#PSQIKST</b>  | <b>-1.17</b> | <b>1.35</b>          | <b>0.43</b>    |
| YML072C        | TCB3         | 1373          | YAPVQSAS#PVVKPTD         | -1.81        | 0.67                 | 0.43           |
| <b>YML072C</b> | <b>TCB3</b>  | <b>1350</b>   | <b>NLNSTSVT#PRASLDY</b>  | <b>-1.57</b> | <b>1.04</b>          | <b>0.43</b>    |
| YPL180W        | TCO89        | 546           | KNSAAPAS#PLSNEHI         | -1.86        | 0.65                 | 0.43           |
| <b>YML064C</b> | <b>TEM1</b>  | <b>240</b>    | <b>SPSSKAPS#PGVNT</b>    | <b>-1.69</b> | <b>0.65</b>          | <b>0.43</b>    |
| YKR062W        | TFA2         | 97            | DDEFDGSS#PSKKVRP         | -2.23        | 0.84                 | 0.43           |
| <b>YKL140W</b> | <b>TGL1</b>  | <b>466</b>    | <b>RTHSADRS#PLSVQAD</b>  | <b>-1.88</b> | <b>0.65</b>          | <b>0.43</b>    |
| <b>YKR089C</b> | <b>TGL4</b>  | <b>756</b>    | <b>SFSSFVAS#PTSRMLR</b>  | <b>-2.83</b> | <b>0.76</b>          | <b>0.43</b>    |
| <b>YKR089C</b> | <b>TGL4</b>  | <b>675</b>    | <b>NSTLLTRT#PTKGDNH</b>  | <b>-1.98</b> | <b>0.65</b>          | <b>0.43</b>    |
| YGL049C        | TIF4632      | 196           | TPFEKEAT#PVLPPANE        | -4.68        | 1.09                 | 1.91           |
| YGL049C        | TIF4632      | 301           | KSGASVKT#PQHVTGS         | -1.49        | 0.51                 | 1.91           |
| YNL088W        | TOP2         | 1250          | TKIKKEKT#PSVSETK         | -2.52        | 0.93                 | 0.43           |
| <b>YLR183C</b> | <b>TOS4</b>  | <b>98</b>     | <b>KFSSKLSS#PSRHTRV</b>  | <b>-2.08</b> | <b>0.77</b>          | <b>2.85</b>    |
| <b>YMR261C</b> | <b>TPS3</b>  | <b>148</b>    | <b>APSARVCS#PSQEASA</b>  | <b>-1.53</b> | <b>0.61</b>          | <b>0.52</b>    |
| YER093C        | TSC11        | 28            | TNTTPLL#PRHSRDN          | -2.53        | 0.63                 | 0.43           |
| <b>YML100W</b> | <b>TSL1</b>  | <b>77</b>     | <b>ISRSATRS#PSAFNRA</b>  | <b>-2.52</b> | <b>0.60</b>          | <b>0.52</b>    |
| <b>YML100W</b> | <b>TSL1</b>  | <b>161</b>    | <b>DSGSRIAS#PIQQQQQ</b>  | <b>-1.28</b> | <b>0.60</b>          | <b>0.52</b>    |
| <b>YML100W</b> | <b>TSL1</b>  | <b>147</b>    | <b>IPTDRIAS#PIQHEHD</b>  | <b>-1.26</b> | <b>0.60</b>          | <b>0.52</b>    |

| ORF                       | SGDB name      | Site position | Context                  | log2 (H/L)   | age precise position | age enrichment |
|---------------------------|----------------|---------------|--------------------------|--------------|----------------------|----------------|
| YML100W                   | TSL1           | 135           | GSVERFFS#PSSNIPT         | -1.07        | 0.60                 | 0.52           |
| YOR124C                   | UBP2           | 917           | EDTTGLTS#PTRVAKI         | -1.18        | 0.63                 | 0.43           |
| <b>YGR184C</b>            | <b>UBR1</b>    | <b>300</b>    | <b>PSNSPEAS#PSLAKID</b>  | <b>-1.13</b> | <b>0.56</b>          | <b>0.43</b>    |
| <b>YGR184C</b>            | <b>UBR1</b>    | <b>296</b>    | <b>AKTSPSNS#PEASPSL</b>  | <b>-1.13</b> | <b>0.56</b>          | <b>0.43</b>    |
| YPL020C                   | ULP1           | 25            | NPYSPLFS#PISTYRC         | -1.62        | 0.97                 | 1.00           |
| YPL020C                   | ULP1           | 21            | YHKKNPYS#PLFSPIS         | -1.62        | 0.88                 | 1.00           |
| <b>YIL031W</b>            | <b>ULP2</b>    | <b>984</b>    | <b>IDDVAFSS#PTRGIPR</b>  | <b>-2.50</b> | <b>0.60</b>          | <b>1.67</b>    |
| <b>YIL031W</b>            | <b>ULP2</b>    | <b>795</b>    | <b>SPETASVS#PPIRHNI</b>  | <b>-1.03</b> | <b>0.65</b>          | <b>1.67</b>    |
| <b>YIL031W</b>            | <b>ULP2</b>    | <b>788</b>    | <b>EDPVRAAS#PETASVS</b>  | <b>-1.03</b> | <b>0.51</b>          | <b>1.67</b>    |
| <b>YML029W</b>            | <b>USA1</b>    | <b>376</b>    | <b>PPDTRSQS#PVSFAPT</b>  | <b>-1.40</b> | <b>0.77</b>          | <b>0.43</b>    |
| <b>YIL135C</b>            | <b>VHS2</b>    | <b>301</b>    | <b>TGAALSRS#PSNQYL</b>   | <b>-1.47</b> | <b>1.04</b>          | <b>1.11</b>    |
| YOR054C                   | VHS3           | 225           | RSRSNSTS#PRPSVVV         | -1.48        | 1.20                 | 1.13           |
| <b>YLR410W</b>            | <b>VIP1</b>    | <b>1107</b>   | <b>FTPVNITS#PNLSFQK</b>  | <b>-2.33</b> | <b>1.58</b>          | <b>0.89</b>    |
| <b>YLL040C</b>            | <b>VPS13</b>   | <b>1379</b>   | <b>SESERTAT#PQSLQGS</b>  | <b>-1.32</b> | <b>0.63</b>          | <b>0.43</b>    |
| <b>YLR337C</b>            | <b>VRP1</b>    | <b>703</b>    | <b>ISKNPTKS#PPPPSP</b>   | <b>-1.24</b> | <b>0.51</b>          | <b>0.98</b>    |
| <b>YLR337C</b>            | <b>VRP1</b>    | <b>709</b>    | <b>KSPPPPPS#PSTMDTG</b>  | <b>-1.17</b> | <b>0.51</b>          | <b>0.98</b>    |
| YML076C                   | WAR1           | 126           | KRKPRSRS#PTPFESP         | -1.03        | 0.60                 | 0.68           |
| YOR083W                   | WHI5           | 154           | RRSEVFLS#PSPRLRS         | -6.54        | 1.18                 | 1.11           |
| YOR083W                   | WHI5           | 156           | SEVFLSPS#PRLRSPP         | -6.54        | 1.11                 | 1.11           |
| YOR083W                   | WHI5           | 88            | SLQGIFMS#PVNKRRV         | -2.95        | 0.99                 | 1.11           |
| YOR083W                   | WHI5           | 161           | SPSPRLRS#PPTAARR         | -2.75        | 1.18                 | 1.11           |
| <b>YOR083W</b>            | <b>WHI5</b>    | <b>62</b>     | <b>FGTPSPPS#PPGITKS</b>  | <b>-1.97</b> | <b>1.12</b>          | <b>1.11</b>    |
| YOR083W                   | WHI5           | 57            | RLKNGFGT#PSPPSPP         | -1.97        | 1.04                 | 1.11           |
| YOR083W                   | WHI5           | 59            | KNGFGTPS#PPSPPGI         | -1.97        | 0.65                 | 1.11           |
| YHL028W                   | WSC4           | 541           | RTSTFLHS#PIQKQHE         | -2.25        | 0.60                 | 1.18           |
| YDR369C                   | XRS2           | 349           | RAPEVEAS#PVVSKKR         | -2.34        | 0.65                 | 0.43           |
| <b>YBL005W-AYBL005W-A</b> |                | <b>409</b>    | <b>NVSTFNNS#PGPDNDL</b>  | <b>-1.03</b> | <b>0.51</b>          | <b>0.53</b>    |
| YCL019W                   | YCL019W        | 1014          | TVESDTTS#PRHSSTL         | -1.68        | 0.51                 | 0.49           |
| <b>YDL089W</b>            | <b>YDL089W</b> | <b>441</b>    | <b>NRPSKSLS#PLRKTPL</b>  | <b>-3.67</b> | <b>1.09</b>          | <b>1.07</b>    |
| <b>YDL089W</b>            | <b>YDL089W</b> | <b>446</b>    | <b>SLSPLRKT#PLSARQK</b>  | <b>-3.67</b> | <b>1.05</b>          | <b>1.07</b>    |
| <b>YDL089W</b>            | <b>YDL089W</b> | <b>474</b>    | <b>DINSILRS#PKKKKNY</b>  | <b>-2.40</b> | <b>1.32</b>          | <b>1.07</b>    |
| YDL156W                   | YDL156W        | 99            | NQLLKMGS#PDGQDKN         | -1.13        | 0.64                 | 0.43           |
| YDL173W                   | YDL173W        | 148           | SLHATTSS#PNNNAPI         | -2.33        | 0.65                 | 0.52           |
| <b>YDL173W</b>            | <b>YDL173W</b> | <b>246</b>    | <b>GGAGNIIS#PKSSRNT</b>  | <b>-1.67</b> | <b>1.05</b>          | <b>0.52</b>    |
| YDR089W                   | YDR089W        | 238           | NNSSLPAS#PRSIPLL         | -1.29        | 0.95                 | 0.43           |
| YDR239C                   | YDR239C        | 63            | APDIPPRS#PNRNAHS         | -2.10        | 0.65                 | 0.63           |
| <b>YDR348C</b>            | <b>YDR348C</b> | <b>121</b>    | <b>SATDFRRS#PPVSRN</b>   | <b>-1.35</b> | <b>0.85</b>          | <b>0.64</b>    |
| YEL043W                   | YEL043W        | 847           | RRSFHASS#PPFNSIW         | -1.12        | 0.91                 | 0.54           |
| YEL043W                   | YEL043W        | 862           | NSNTNQLS#PPLEEYQ         | -1.12        | 0.51                 | 0.54           |
| <b>YER079W</b>            | <b>YER079W</b> | <b>41</b>     | <b>DLDQRSMS#PSNIASG</b>  | <b>-1.41</b> | <b>0.65</b>          | <b>0.43</b>    |
| YFL042C                   | YFL042C        | 149           | ATIAEIGS#PLQQVEK         | -2.44        | 0.75                 | 0.80           |
| YFL042C                   | YFL042C        | 103           | SFKSNVPS#PVSRSTT         | -1.21        | 0.65                 | 0.80           |
| YFL042C                   | YFL042C        | 110           | SPVSRSTT#PTSPVSQ         | -1.01        | 0.65                 | 0.80           |
| <b>YGR125W</b>            | <b>YGR125W</b> | <b>42</b>     | <b>RASVSAMS#PPLCRSY</b>  | <b>-1.11</b> | <b>0.65</b>          | <b>0.43</b>    |
| YGR237C                   | YGR237C        | 117           | PSKSYLRS#PSVERSR         | -3.13        | 0.61                 | 0.47           |
| <b>YHR159W</b>            | <b>YHR159W</b> | <b>236</b>    | <b>HLDPSLNT#PVKNRAF</b>  | <b>-3.11</b> | <b>0.80</b>          | <b>0.81</b>    |
| <b>YHR159W</b>            | <b>YHR159W</b> | <b>244</b>    | <b>PVKNRAFS#PVYQNIP</b>  | <b>-2.72</b> | <b>0.80</b>          | <b>0.81</b>    |
| <b>YHR159W</b>            | <b>YHR159W</b> | <b>29</b>     | <b>RNSIIMS#PVRKTGR</b>   | <b>-2.38</b> | <b>0.77</b>          | <b>0.81</b>    |
| <b>YHR159W</b>            | <b>YHR159W</b> | <b>286</b>    | <b>TNQRSRSVS#PQDIQER</b> | <b>-1.02</b> | <b>0.80</b>          | <b>0.81</b>    |
| YIL024C                   | YIL024C        | 107           | QLMDIPLS#PHTRSNT         | -1.99        | 0.65                 | 0.43           |
| <b>YIR007W</b>            | <b>YIR007W</b> | <b>594</b>    | <b>YHDTRAKT#PTPEPSP</b>  | <b>-1.38</b> | <b>0.97</b>          | <b>0.43</b>    |
| YIR007W                   | YIR007W        | 596           | DTRAKTPT#PEPSPAS         | -1.14        | 0.61                 | 0.43           |
| YJL193W                   | YJL193W        | 247           | SGFSRQES#PLPLYEK         | -3.69        | 1.01                 | 0.72           |
| YKL105C                   | YKL105C        | 980           | SWTFGLPS#PLKRRTS         | -3.65        | 0.65                 | 0.62           |
| YKR077W                   | YKR077W        | 147           | QPAATAPS#PLVSNII         | -2.19        | 0.65                 | 0.58           |
| YKR077W                   | YKR077W        | 157           | VSNIKPS#PKKLASP          | -2.19        | 0.65                 | 0.58           |
| YLL032C                   | YLL032C        | 762           | NTSQSGAS#PQRHKMP         | -1.87        | 0.51                 | 0.58           |

| ORF            | SGDB name      | Site position | Context                  | log2 (H/L)   | age precise position | age enrichment |
|----------------|----------------|---------------|--------------------------|--------------|----------------------|----------------|
| YLR049C        | YLR049C        | 80            | QGSPVAPS#PNHRSTM         | -1.24        | 0.59                 | 0.43           |
| YMR086W        | YMR086W        | 675           | HSAIPLGT#PEKGKPK         | -3.94        | 0.77                 | 0.78           |
| YMR086W        | YMR086W        | 870           | QKENNVVS#PGVSSPN         | -1.91        | 0.56                 | 0.78           |
| YMR086W        | YMR086W        | 658           | SIRSNSPS#PPEKINN         | -1.62        | 0.79                 | 0.78           |
| <b>YMR124W</b> | <b>YMR124W</b> | <b>586</b>    | <b>FSSTFSDS#PSKQRRI</b>  | <b>-1.71</b> | <b>0.94</b>          | <b>0.83</b>    |
| YMR196W        | YMR196W        | 1081          | IDPMDPMS#PLNKDVS         | -1.25        | 0.60                 | 0.43           |
| YMR233W        | YMR233W        | 113           | RKKKKKND#PDSNSIS         | -3.86        | 0.60                 | 0.43           |
| YMR291W        | YMR291W        | 538           | NEVDLLLT#PRTASMS         | -1.31        | 0.65                 | 0.43           |
| <b>YNL058C</b> | <b>YNL058C</b> | <b>292</b>    | <b>SATSNLSS#PKKAHKR</b>  | <b>-1.63</b> | <b>0.90</b>          | <b>0.62</b>    |
| <b>YNL224C</b> | <b>YNL224C</b> | <b>345</b>    | <b>NNLLPSPS#PQLTEDI</b>  | <b>-2.60</b> | <b>0.79</b>          | <b>0.43</b>    |
| YNL224C        | YNL224C        | 343           | ADNNLLPS#PSPQLTE         | -2.60        | 0.65                 | 0.43           |
| <b>YNL321W</b> | <b>YNL321W</b> | <b>118</b>    | <b>VPDLNTAT#PSSPKRM</b>  | <b>-1.97</b> | <b>0.83</b>          | <b>0.43</b>    |
| <b>YNL321W</b> | <b>YNL321W</b> | <b>121</b>    | <b>LNTATPSS#PKRMHSS</b>  | <b>-1.97</b> | <b>0.65</b>          | <b>0.43</b>    |
| <b>YNR047W</b> | <b>YNR047W</b> | <b>201</b>    | <b>GRRRSPST#PIMPSON</b>  | <b>-2.09</b> | <b>1.35</b>          | <b>1.32</b>    |
| <b>YNR047W</b> | <b>YNR047W</b> | <b>198</b>    | <b>TGTGRRRS#PSTPIMP</b>  | <b>-2.09</b> | <b>1.09</b>          | <b>1.32</b>    |
| <b>YNR047W</b> | <b>YNR047W</b> | <b>175</b>    | <b>REHSNCGS#PIMLSSS</b>  | <b>-1.56</b> | <b>0.65</b>          | <b>1.32</b>    |
| <b>YNR047W</b> | <b>YNR047W</b> | <b>339</b>    | <b>LKDTLNCS#PSRGSSK</b>  | <b>-1.48</b> | <b>1.08</b>          | <b>1.32</b>    |
| <b>YNR047W</b> | <b>YNR047W</b> | <b>137</b>    | <b>MTSVANAS#PASPLS</b>   | <b>-1.38</b> | <b>0.84</b>          | <b>1.32</b>    |
| <b>YNR047W</b> | <b>YNR047W</b> | <b>140</b>    | <b>VANASPAS#PPLSPTI</b>  | <b>-1.00</b> | <b>1.33</b>          | <b>1.32</b>    |
| <b>YNR047W</b> | <b>YNR047W</b> | <b>144</b>    | <b>SPASPPLS#PTIPETD</b>  | <b>-1.00</b> | <b>1.09</b>          | <b>1.32</b>    |
| <b>YOL070C</b> | <b>YOL070C</b> | <b>403</b>    | <b>YEDIIET#PKKTKLK</b>   | <b>-1.14</b> | <b>0.65</b>          | <b>0.61</b>    |
| <b>YOR227W</b> | <b>YOR227W</b> | <b>61</b>     | <b>VPTKTIAS#PQRPLSG</b>  | <b>-1.02</b> | <b>0.68</b>          | <b>0.72</b>    |
| <b>YML027W</b> | <b>YOX1</b>    | <b>324</b>    | <b>NPQKKTTLT#PVKTSPN</b> | <b>-1.42</b> | <b>1.35</b>          | <b>2.07</b>    |
| <b>YPL141C</b> | <b>YPL141C</b> | <b>441</b>    | <b>LSHEQSLS#PVQNIRQ</b>  | <b>-1.44</b> | <b>0.56</b>          | <b>1.55</b>    |
| <b>YPL150W</b> | <b>YPL150W</b> | <b>456</b>    | <b>YSHSIAGS#PRKSNNF</b>  | <b>-1.09</b> | <b>0.65</b>          | <b>0.71</b>    |
| <b>YPR091C</b> | <b>YPR091C</b> | <b>676</b>    | <b>SQPLNTLS#PKLEGRK</b>  | <b>-1.13</b> | <b>0.73</b>          | <b>1.35</b>    |
| <b>YPR115W</b> | <b>YPR115W</b> | <b>969</b>    | <b>ARRGSDLS#PFEMESP</b>  | <b>-3.18</b> | <b>0.51</b>          | <b>0.80</b>    |
| <b>YPR115W</b> | <b>YPR115W</b> | <b>975</b>    | <b>LSPFEMES#PLFEENR</b>  | <b>-2.70</b> | <b>0.65</b>          | <b>0.80</b>    |
| <b>YPR174C</b> | <b>YPR174C</b> | <b>170</b>    | <b>VNPLVTSS#PIHMSPL</b>  | <b>-2.85</b> | <b>1.12</b>          | <b>0.49</b>    |
| <b>YPR174C</b> | <b>YPR174C</b> | <b>175</b>    | <b>TSSPIHMS#PLQSRQR</b>  | <b>-2.85</b> | <b>0.65</b>          | <b>0.49</b>    |
| <b>YIL063C</b> | <b>YRB2</b>    | <b>31</b>     | <b>PIDKLDGT#PKRPREK</b>  | <b>-1.24</b> | <b>0.56</b>          | <b>0.72</b>    |
| <b>YHR016C</b> | <b>YSC84</b>   | <b>311</b>    | <b>EDYDYGRS#PNRNSSR</b>  | <b>-2.60</b> | <b>0.63</b>          | <b>0.43</b>    |
| <b>YDR326C</b> | <b>YSP2</b>    | <b>572</b>    | <b>FLNRRSFS#PSNLGK</b>   | <b>-1.20</b> | <b>1.08</b>          | <b>0.74</b>    |
| <b>YNR039C</b> | <b>ZRG17</b>   | <b>58</b>     | <b>QNRTFFAS#PRPSSLF</b>  | <b>-2.51</b> | <b>1.23</b>          | <b>0.76</b>    |
| <b>YER033C</b> | <b>ZRG8</b>    | <b>914</b>    | <b>LNRRTLKS#PLRGGSK</b>  | <b>-4.46</b> | <b>1.20</b>          | <b>1.19</b>    |



**Table S2. (Following pages)** Cdk1-dependent phosphorylation sites identified in multiple biological experiments. This table lists phosphorylation sites in peptides that declined in abundance by at least 50% following Cdk1 inhibition in one experiment and also declined after Cdk1 inhibition in another experiment (as indicated by bold font in Table S1; see Dataset S2 for details). Column labels and formatting as in Table S1.

| ORF     | SGDB name | Site position | Context           | log2 (H/L) | age precise position | age enrichment |
|---------|-----------|---------------|-------------------|------------|----------------------|----------------|
| YCR088W | ABP1      | 165           | PPVKKSFT#PSKSPAP  | -3.06      | 1.68                 | 0.95           |
| YCR088W | ABP1      | 169           | KSFTPSKS#PAPVSKK  | -3.06      | 0.63                 | 0.95           |
| YCR088W | ABP1      | 181           | SKKEPVKT#PSPAPAA  | -1.74      | 0.61                 | 0.95           |
| YCR088W | ABP1      | 183           | KEPVKTPS#PAPAAKI  | -1.32      | 0.63                 | 0.95           |
| YLR131C | ACE2      | 486           | IPGSSNNT#PIKNSLP  | -3.51      | 1.76                 | 2.72           |
| YLR131C | ACE2      | 392           | SPGGLSIS#PRINGNS  | -3.28      | 0.78                 | 2.72           |
| YLR131C | ACE2      | 80            | LDIPLVPS#PKTGDGS  | -1.27      | 0.77                 | 2.72           |
| YLR131C | ACE2      | 253           | NSNSKPGS#PVILKTP  | -1.06      | 0.78                 | 2.72           |
| YJR083C | ACF4      | 71            | QRSTTNQS#PVSDHAS  | -1.38      | 1.00                 | 0.69           |
| YBR059C | AKL1      | 504           | DPTISEQS#PRLNTQS  | -2.86      | 0.60                 | 1.40           |
| YBR059C | AKL1      | 801           | EALLIELS#PLKEDAG  | -1.54      | 0.87                 | 1.40           |
| YJL084C | ALY2      | 213           | NGPSRNLS#PINLLKR  | -2.27      | 1.68                 | 1.65           |
| YJL020C | BBC1      | 103           | KDLPEPIS#PETKKET  | -1.03      | 0.51                 | 1.10           |
| YFL007W | BLM10     | 29            | QLKRFERS#PGRPSSS  | -1.95      | 0.76                 | 0.43           |
| YER114C | BOI2      | 519           | QGGGKALS#PIPSPTR  | -1.07      | 0.73                 | 2.79           |
| YER114C | BOI2      | 523           | KALSPIPS#PTRNSVR  | -1.07      | 0.65                 | 2.79           |
| YPR171W | BSP1      | 309           | KPKPTPPS#PPAKRIP  | -1.10      | 0.63                 | 0.77           |
| YCL014W | BUD3      | 1440          | PVEELPNT#PRSNIVT  | -1.78      | 0.61                 | 0.90           |
| YLR319C | BUD6      | 327           | IDDVSKAS#PLAKTPL  | -1.17      | 0.61                 | 0.66           |
| YAL038W | CDC19     | 407           | VLSTSGTT#PRLVSKY  | -1.89      | 1.23                 | 0.43           |
| YLR314C | CDC3      | 503           | ELSINSAS#PNVNHSP  | -2.24      | 0.63                 | 0.43           |
| YLR314C | CDC3      | 509           | ASPNVNHS#PVPTKKK  | -1.67      | 1.25                 | 0.43           |
| YPL160W | CDC60     | 142           | EEEIKEET#PAEKDHE  | -1.52      | 0.63                 | 0.43           |
| YOR042W | CUE5      | 364           | AETTYIDT#PDTETTK  | -1.68      | 1.44                 | 0.43           |
| YER088C | DOT6      | 491           | DMLSPTHS#PQKTLK   | -2.00      | 0.95                 | 1.80           |
| YBL101C | ECM21     | 1030          | DKLLSTPS#PVNRSHN  | -1.89      | 0.91                 | 1.07           |
| YMR219W | ESC1      | 1145          | DRSNIFSS#PIRVIGA  | -1.69      | 0.63                 | 0.43           |
| YNL068C | FKH2      | 833           | ETKDINSS#PLKNQGG  | -1.51      | 0.60                 | 2.34           |
| YAL035W | FUN12     | 386           | AKSTPAAT#PAATPTP  | -1.07      | 0.63                 | 0.43           |
| YDL226C | GCS1      | 170           | LENRRSAT#PANSSNG  | -4.40      | 1.11                 | 0.43           |
| YDL226C | GCS1      | 161           | VAQSREGT#PLENRRS  | -1.32      | 1.89                 | 0.43           |
| YDR309C | GIC2      | 337           | AFFPSRQS#PLPKRRN  | -3.37      | 0.79                 | 0.85           |
| YDR096W | GIS1      | 696           | ISREASKS#PISSFVN  | -2.86      | 0.60                 | 0.99           |
| YLR258W | GSY2      | 655           | RPLSVPGS#PRDLRSN  | -1.65      | 2.96                 | 0.43           |
| YMR192W | GYL1      | 17            | ERIEVPRT#PHQTQPE  | -2.35      | 0.76                 | 0.57           |
| YJL146W | IDS2      | 130           | PEPSEAS#PIRQPSV   | -1.10      | 0.65                 | 0.43           |
| YOR109W | INP53     | 986           | PSTSKEKS#PTPQTST  | -4.34      | 0.51                 | 0.43           |
| YBR245C | ISW1      | 694           | TSTGSAGT#PEPGSGE  | -2.32      | 1.11                 | 0.43           |
| YOR304W | ISW2      | 1079          | TSATREDT#PLSQNES  | -3.00      | 0.74                 | 0.43           |
| YHR102W | KIC1      | 735           | PLFGVGTS#PNRKPAG  | -2.07      | 0.74                 | 0.79           |
| YLR096W | KIN2      | 609           | IPEQAHTS#PTSRSKSS | -1.59      | 1.02                 | 1.31           |
| YEL032W | MCM3      | 781           | QPASNSGS#PIKSTPR  | -1.90      | 0.75                 | 0.43           |
| YGL197W | MDS3      | 693           | EDDEDVPS#PKPVSKS  | -1.08      | 0.65                 | 1.03           |
| YNL074C | MLF3      | 79            | KNSNNVSS#PLDNVIP  | -2.18      | 0.65                 | 1.07           |
| YNL074C | MLF3      | 183           | SSESSPAS#PDLKLSR  | -1.68      | 0.65                 | 1.07           |
| YIL106W | MOB1      | 80            | ESDHGRMS#PVLTPPK  | -4.65      | 0.65                 | 0.44           |
| YIL106W | MOB1      | 36            | ANNAGSVS#PTKATPH  | -1.20      | 1.07                 | 0.44           |
| YDR097C | MSH6      | 228           | YNTSHSSS#PFTRNIS  | -1.84      | 1.18                 | 0.43           |
| YLR116W | MSL5      | 378           | SRYAPSPS#PPASHIS  | -1.21      | 1.06                 | 0.71           |
| YPL070W | MUK1      | 245           | IVGTSVSS#PNKMKTF  | -2.42      | 0.99                 | 0.43           |
| YBL024W | NCL1      | 426           | TEKLSSET#PALESEG  | -1.76      | 0.75                 | 0.43           |
| YJL076W | NET1      | 1032          | SSKIEAPS#PSVNKKI  | -3.46      | 0.56                 | 1.05           |
| YPR072W | NOT5      | 306           | FDNSTLGT#PTTHVSM  | -1.33      | 0.97                 | 0.55           |
| YAR002W | NUP60     | 222           | FNYSLLPS#PYKTTVY  | -2.35      | 1.65                 | 1.02           |
| YAR002W | NUP60     | 382           | NVVAETS#PEKKDGG   | -1.47      | 1.22                 | 1.02           |
| YHR118C | ORC6      | 116           | KQFAWTPS#PKKNKRS  | -1.12      | 1.58                 | 1.30           |
| YHR118C | ORC6      | 114           | PMKQFAWT#PSPKKNK  | -1.12      | 1.18                 | 1.30           |

| ORF     | SGDB name | Site position | Context           | log2 (H/L) | age precise position | age enrichment |
|---------|-----------|---------------|-------------------|------------|----------------------|----------------|
| YGR178C | PBP1      | 436           | TPSAKTVS#PTTQISA  | -1.95      | 0.92                 | 2.14           |
| YBL051C | PIN4      | 541           | LLRNSQIS#PPNSQIP  | -1.25      | 1.31                 | 0.89           |
| YBL051C | PIN4      | 466           | SMQPTLTS#PKMNIHH  | -1.01      | 0.79                 | 0.89           |
| YNL102W | POL1      | 170           | LRENLNSS#PTSEFKS  | -1.28      | 0.77                 | 0.43           |
| YLR018C | POM34     | 273           | NDNNSPHT#PVTRKGY  | -1.13      | 0.65                 | 0.85           |
| YML016C | PPZ1      | 265           | AYSTPLNS#PGLSKLT  | -1.83      | 1.21                 | 0.65           |
| YBL046W | PSY4      | 434           | TYRENISS#PLGKKS   | -2.48      | 1.02                 | 0.43           |
| YJR059W | PTK2      | 727           | LKSMNLST#PTTPTHN  | -1.25      | 0.86                 | 2.12           |
| YJR059W | PTK2      | 730           | MLNSTPTT#PTHNGPT  | -1.25      | 0.73                 | 2.12           |
| YJR059W | PTK2      | 737           | TPTHNGPT#PLPAKAG  | -1.08      | 0.65                 | 2.12           |
| YDR217C | RAD9      | 26            | AIKEALHS#PLADGDM  | -1.43      | 0.63                 | 1.44           |
| YDR217C | RAD9      | 56            | STNIEGS#PKANPNP   | -1.15      | 1.07                 | 1.44           |
| YJR033C | RAV1      | 1211          | PVQKLLKS#PTKDRAY  | -1.08      | 0.63                 | 0.43           |
| YLR248W | RCK2      | 46            | DVSQITSS#PKKSFQD  | -1.26      | 0.51                 | 0.43           |
| YDR028C | REG1      | 421           | NLDQNLNS#PDNNRFP  | -1.10      | 0.60                 | 1.73           |
| YPR018W | RLF2      | 94            | KLLCYKNS#PIQSTKY  | -2.47      | 0.83                 | 0.54           |
| YER169W | RPH1      | 575           | SLIKRVKS#PNIVTLN  | -3.39      | 1.18                 | 1.15           |
| YER169W | RPH1      | 561           | ISHSAPHS#PVNPNIS  | -1.38      | 0.77                 | 1.15           |
| YER169W | RPH1      | 430           | SKSSGVSS#PLLSRMK  | -1.08      | 1.18                 | 1.15           |
| YDR418W | RPL12B    | 38            | KIGPLGLS#PKKVGED  | -2.25      | 2.73                 | 0.43           |
| YLR357W | RSC2      | 682           | IPLSRVGS#PGAGGPL  | -2.69      | 1.09                 | 0.94           |
| YLR357W | RSC2      | 243           | LRDNRSTT#PSHSGTP  | -1.25      | 0.73                 | 0.94           |
| YDR159W | SAC3      | 600           | VKPQINTS#PKRVATR  | -1.27      | 0.66                 | 0.87           |
| YER129W | SAK1      | 966           | KLSELSNS#PQKGSNN  | -1.63      | 0.56                 | 1.41           |
| YGL056C | SDS23     | 405           | SSSPSPST#PPVTTLP  | -1.32      | 0.60                 | 0.92           |
| YBR214W | SDS24     | 458           | TAMEDPPS#PRSSAIA  | -1.30      | 0.86                 | 0.86           |
| YPL085W | SEC16     | 1515          | IGDSLQGS#PQRIHNT  | -1.43      | 0.65                 | 2.62           |
| YDR170C | SEC7      | 1240          | DVWGKAT#PTELAQE   | -1.37      | 1.42                 | 0.43           |
| YBL058W | SHP1      | 315           | GQGQRLGS#PIPGESS  | -1.29      | 2.61                 | 0.43           |
| YBL058W | SHP1      | 322           | SPIPGESS#PAEVPKN  | -1.05      | 0.65                 | 0.43           |
| YDL225W | SHS1      | 447           | SSPKFLNS#PDLPERT  | -2.11      | 0.79                 | 0.43           |
| YOL004W | SIN3      | 304           | DDPIRVTT#PMGTTTV  | -1.62      | 2.72                 | 0.58           |
| YOL004W | SIN3      | 316           | TTVNNNIS#PSGRGTT  | -1.62      | 0.56                 | 0.58           |
| YDL042C | SIR2      | 23            | NKVSNTVS#PTQDKDA  | -1.13      | 0.56                 | 0.43           |
| YKR072C | SIS2      | 56            | VSGRQSIG#PTLSNAT  | -1.33      | 0.65                 | 1.15           |
| YNL243W | SLA2      | 294           | PARTPART#PTPTPPV  | -1.62      | 2.12                 | 0.43           |
| YNL243W | SLA2      | 308           | VVAEPAIS#PRPVSQR  | -1.62      | 0.70                 | 0.43           |
| YNL243W | SLA2      | 298           | PARTPTPT#PPVVAEP  | -1.13      | 0.60                 | 0.43           |
| YNL243W | SLA2      | 296           | RTPARTPT#PTPPVVA  | -1.09      | 1.02                 | 0.43           |
| YDR515W | SLF1      | 42            | TSPWKSSS#PDSNTVI  | -1.10      | 0.63                 | 0.43           |
| YNL047C | SLM2      | 649           | FYIENVDS#PRKSNQL  | -2.33      | 0.79                 | 0.51           |
| YLR086W | SMC4      | 113           | YSQSPPRS#PGRSPTR  | -1.98      | 2.01                 | 0.43           |
| YDR006C | SOK1      | 193           | NINNPSPS#PPPSSKQ  | -1.24      | 0.65                 | 0.43           |
| YDR006C | SOK1      | 191           | YTNINNPS#PSPPSS   | -1.24      | 0.64                 | 0.43           |
| YLL021W | SPA2      | 585           | NDVEEES#PVKPLKI   | -3.34      | 1.18                 | 1.29           |
| YLL021W | SPA2      | 599           | ITQKAINS#PIIRPSS  | -2.04      | 0.84                 | 1.29           |
| YLL021W | SPA2      | 254           | NYWDVNSD#PIIKVDK  | -1.68      | 0.65                 | 1.29           |
| YLL021W | SPA2      | 979           | GEVDKIES#PRMVRES  | -1.58      | 0.76                 | 1.29           |
| YLL021W | SPA2      | 883           | EPLGNVES#PDMTQKV  | -1.44      | 0.60                 | 1.29           |
| YDR293C | SSD1      | 492           | NDSDSLSS#PTKSGVR  | -1.03      | 0.84                 | 0.43           |
| YLR006C | SSK1      | 195           | LLRFASVS#PYPKFHS  | -2.85      | 0.63                 | 2.57           |
| YNR031C | SSK2      | 54            | TQARVASS#PISPGLH  | -2.48      | 0.91                 | 0.51           |
| YNR031C | SSK2      | 57            | RVASSPIS#PGLHSTQ  | -2.48      | 0.79                 | 0.51           |
| YHL007C | STE20     | 502           | MNSAANVS#PLKQTHA  | -1.85      | 0.65                 | 1.11           |
| YGR008C | STF2      | 28            | HTGNYGES#PNHIKKQ  | -1.50      | 1.04                 | 0.43           |
| YDR310C | SUM1      | 738           | QTENTSIS#PKKRRTTE | -1.71      | 0.51                 | 0.53           |
| YDR146C | SWI5      | 492           | FVISETPS#PVLKSQS  | -2.48      | 1.08                 | 2.61           |

| ORF                | SGDB name | Site position | Context          | log2 (H/L) | age precise position | age enrichment |
|--------------------|-----------|---------------|------------------|------------|----------------------|----------------|
| YML072C            | TCB3      | 1350          | NLNSTSVT#PRASLDY | -1.57      | 1.04                 | 0.43           |
| YML064C            | TEM1      | 240           | SPSSKAPS#PGVNT   | -1.69      | 0.65                 | 0.43           |
| YKL140W            | TGL1      | 466           | RTHSADRS#PLSVQAD | -1.88      | 0.65                 | 0.43           |
| YMR261C            | TPS3      | 148           | APSARVCS#PSQEASA | -1.53      | 0.61                 | 0.52           |
| YML100W            | TSL1      | 77            | ISRSATRS#PSAFNRA | -2.52      | 0.60                 | 0.52           |
| YML100W            | TSL1      | 161           | DSGSRIAS#PIQQQQQ | -1.28      | 0.60                 | 0.52           |
| YML100W            | TSL1      | 147           | IPTDRIAS#PIQHEHD | -1.26      | 0.60                 | 0.52           |
| YGR184C            | UBR1      | 300           | PSNSPEAS#PSLAKID | -1.13      | 0.56                 | 0.43           |
| YGR184C            | UBR1      | 296           | AKTSPSNS#PEASPSL | -1.13      | 0.56                 | 0.43           |
| YIL031W            | ULP2      | 984           | IDDVAFSS#PTRGIPR | -2.50      | 0.60                 | 1.67           |
| YML029W            | USA1      | 376           | PPDTRSQS#PVSFAPT | -1.40      | 0.77                 | 0.43           |
| YIL135C            | VHS2      | 301           | TGAALSRS#PSNQYQL | -1.47      | 1.04                 | 1.11           |
| YLR410W            | VIP1      | 1107          | FTPVNITS#PNLSFQK | -2.33      | 1.58                 | 0.89           |
| YLL040C            | VPS13     | 1379          | SESERTAT#PQSLQGS | -1.32      | 0.63                 | 0.43           |
| YLR337C            | VRP1      | 703           | ISKNPTKS#PPPPSP  | -1.24      | 0.51                 | 0.98           |
| YLR337C            | VRP1      | 709           | KSPPPPPS#PSTMDTG | -1.17      | 0.51                 | 0.98           |
| YOR083W            | WHI5      | 62            | FGTPSPPS#PPGITKS | -1.97      | 1.12                 | 1.11           |
| YBL005W-AYBL005W-A |           | 409           | NVSTFNNS#PGPDNDL | -1.03      | 0.51                 | 0.53           |
| YDL173W            | YDL173W   | 246           | GGAGNIIS#PKSSRNT | -1.67      | 1.05                 | 0.52           |
| YDR348C            | YDR348C   | 121           | SATDFRRS#PPPVSRN | -1.35      | 0.85                 | 0.64           |
| YER079W            | YER079W   | 41            | DLDQRSMS#PSNIASG | -1.41      | 0.65                 | 0.43           |
| YGR125W            | YGR125W   | 42            | RASVSAMS#PPLCRSY | -1.11      | 0.65                 | 0.43           |
| YHR159W            | YHR159W   | 286           | TNQSRSVS#PQDIQER | -1.02      | 0.80                 | 0.81           |
| YIR007W            | YIR007W   | 594           | YHDTRAKT#PTPEPSP | -1.38      | 0.97                 | 0.43           |
| YMR124W            | YMR124W   | 586           | FSSTFSDS#PSKQRIL | -1.71      | 0.94                 | 0.83           |
| YNL058C            | YNL058C   | 292           | SATSNTSS#PKKAHKR | -1.63      | 0.90                 | 0.62           |
| YNL224C            | YNL224C   | 345           | NNLLPSPS#PQLTEDI | -2.60      | 0.79                 | 0.43           |
| YNL321W            | YNL321W   | 121           | LNTATPSS#PKRMHSS | -1.97      | 0.65                 | 0.43           |
| YNR047W            | YNR047W   | 339           | LKDTLNGS#PSRGSSK | -1.48      | 1.08                 | 1.32           |
| YNR047W            | YNR047W   | 137           | MTSVANAS#PASPLS  | -1.38      | 0.84                 | 1.32           |
| YNR047W            | YNR047W   | 140           | VANASPAS#PPLSPTI | -1.00      | 1.33                 | 1.32           |
| YNR047W            | YNR047W   | 144           | SPASPPLS#PTIPETD | -1.00      | 1.09                 | 1.32           |
| YPR091C            | YPR091C   | 676           | SQPLNTLS#PKLEGRK | -1.13      | 0.73                 | 1.35           |
| YPR174C            | YPR174C   | 170           | VNPLVTSS#PIHMSPL | -2.85      | 1.12                 | 0.49           |
| YPR174C            | YPR174C   | 175           | TSSPIHMS#PLQSRQR | -2.85      | 0.65                 | 0.49           |
| YIL063C            | YRB2      | 31            | PIDKLDGT#PKRPREK | -1.24      | 0.56                 | 0.72           |
| YHR016C            | YSC84     | 311           | EDYDYGRS#PNRNSSR | -2.60      | 0.63                 | 0.43           |
| YDR326C            | YSP2      | 572           | FLNRRSFS#PSNLGNK | -1.20      | 1.08                 | 0.74           |

| <b>GOID</b> | <b>Gene Ontology Term</b>            | <b>Frequency</b> | <b>Background</b> | <b>P-value</b> |
|-------------|--------------------------------------|------------------|-------------------|----------------|
| 7049        | cell cycle                           | 74/308 24.0%     | 472/7163 6.6%     | 3.61E-21       |
| 278         | mitotic cell cycle                   | 53/308 17.2%     | 287/7163 4.0%     | 1.36E-17       |
| 7346        | regulation of mitotic cell cycle     | 24/308 7.8%      | 75/7163 1.0%      | 1.56E-12       |
| 51726       | regulation of cell cycle             | 34/308 11.0%     | 161/7163 2.2%     | 2.48E-12       |
| 902         | cell morphogenesis                   | 32/308 10.4%     | 151/7163 2.1%     | 1.52E-11       |
| 910         | cytokinesis                          | 27/308 8.8%      | 117/7163 1.6%     | 2.05E-10       |
| 33043       | regulation of organelle organization | 26/308 8.4%      | 111/7163 1.5%     | 3.96E-10       |
| 30010       | establishment of cell polarity       | 25/308 8.1%      | 106/7163 1.5%     | 9.55E-10       |
| 51783       | regulation of nuclear division       | 18/308 5.8%      | 52/7163 0.7%      | 1.17E-09       |
| 19954       | asexual reproduction                 | 22/308 7.1%      | 84/7163 1.2%      | 2.29E-09       |
| 7114        | cell budding                         | 22/308 7.1%      | 84/7163 1.2%      | 2.29E-09       |
| 7096        | regulation of exit from mitosis      | 12/308 3.9%      | 24/7163 0.3%      | 3.68E-08       |
| 30036       | actin cytoskeleton organization      | 21/308 6.8%      | 101/7163 1.4%     | 7.73E-07       |
| 6270        | DNA replication initiation           | 12/308 3.9%      | 35/7163 0.5%      | 7.41E-06       |
| 8361        | regulation of cell size              | 21/308 6.8%      | 117/7163 1.6%     | 1.25E-05       |

**Table S3.** Gene ontology analysis of Cdk1 substrates. The set of proteins defined as Cdk1 substrates by our quantitative mass spectrometry experiments were assessed for enrichment in Gene Ontology categories (20).

|         |                             |              |                               | Non-Phosphopeptides            |                            | Phosphopeptides                |                                                 |                |
|---------|-----------------------------|--------------|-------------------------------|--------------------------------|----------------------------|--------------------------------|-------------------------------------------------|----------------|
|         |                             | all proteins | motif matches in all proteins | proteins sampled in experiment | false instances (all S/Ts) | proteins sampled in experiment | motif matches in proteins sampled in experiment | true instances |
| PsiPred | Helix Residue Count         | 1,145,218    | 1,020                         | 630,388                        | 12,587                     | 72,048                         | 64                                              | 35             |
|         | Sheet Residue Count         | 324,753      | 521                           | 188,986                        | 4,518                      | 20,525                         | 29                                              | 1              |
|         | Loop Residue Count          | 1,442,764    | 18,500                        | 787,782                        | 20,635                     | 155,838                        | 2,874                                           | 511            |
|         | Helix Residue Fraction      | 39.3%        | 5.1%                          | 39.2%                          | 33.4%                      | 29.0%                          | 2.2%                                            | 6.4%           |
|         | Sheet Residue Fraction      | 11.1%        | 2.6%                          | 11.8%                          | 12.0%                      | 8.3%                           | 1.0%                                            | 0.2%           |
|         | Loop Residue Fraction       | 49.5%        | 92.3%                         | 49.0%                          | 54.7%                      | 62.7%                          | 96.9%                                           | 93.4%          |
| PONDR   | Disorder Residue Count      | 1,143,370    | 12,662                        | 604,523                        | 16,591                     | 145,079                        | 2,501                                           | 535            |
|         | Disorder Residue Fraction   | 37.7%        | 60.6%                         | 37.7%                          | 44.0%                      | 58.6%                          | 84.6%                                           | 98.5%          |
| PFam    | Residues In Domain Count    | 1,092,024    | 6,007                         | 664,421                        | 18,620                     | 61,465                         | 375                                             | 32             |
|         | Residues In Domain Fraction | 38.2%        | 30.5%                         | 41.3%                          | 49.3%                      | 24.7%                          | 12.6%                                           | 5.9%           |

**Table S4.** Phosphorylation sites are located in loops and disordered regions, outside of predicted protein domains. Analysis of the placement of Cdk1 phosphorylation sites in predicted secondary structure (top, PsiPred), predicted intrinsically ordered/disordered regions (middle, PONDR), and predicted domains (bottom, Pfam) (10-14). Each column refers to a particular subset of residues, as follows: “all proteins” indicates all residues in all proteins in the yeast proteome; ‘motif matches in all proteins’ indicates all serines and threonines in the yeast proteome that are followed by a proline; ‘proteins sampled in experiment’ indicates all residues in all peptides analyzed in our experiments (nonphosphopeptides on the left, phosphopeptides on the right); ‘motif matches in proteins sampled in experiment’ indicates all serines and threonines followed by a proline in all phosphopeptides, whether they were detectably phosphorylated or not; and “true instances” indicates the 547 serines and threonines that we identified as Cdk1-dependent phosphorylation sites. Values indicate the number of residues of a given type; for example, the count in the upper-leftmost cell of the table indicates the number of all residues across all proteins that fall within predicted helices, and fractions are the relative frequency of that residue type. The comparison of all proteins with all nonphosphopeptides sampled in our experiment indicates that there is no intrinsic bias in recovery or detection of different protein regions during cell lysis, protein recovery, digestion, and LC-MS/MS. Values for all proteins and true instances are plotted in Fig. 3A.

|                |          | # of consensus motif instances found in protein |         |         |         |         |         |         |         |         |         |         |         |         |
|----------------|----------|-------------------------------------------------|---------|---------|---------|---------|---------|---------|---------|---------|---------|---------|---------|---------|
|                |          | 0                                               | 1       | 2       | 3       | 4       | 5       | 6       | 7       | 8       | 9       | 10      | 11      | 12      |
| protein length | Expected | p-value                                         |         |         |         |         |         |         |         |         |         |         |         |         |
|                | 50       | 0.355                                           | 1.0E+00 | 3.0E-01 | 5.0E-02 | 5.7E-03 | 5.0E-04 | 3.5E-05 | 2.1E-06 | 1.0E-07 | 4.6E-09 | 1.8E-10 | 6.3E-12 | 2.0E-13 |
| 100            | 0.71     | 1.0E+00                                         | 5.1E-01 | 1.6E-01 | 3.5E-02 | 6.0E-03 | 8.4E-04 | 9.7E-05 | 9.7E-06 | 8.5E-07 | 6.7E-08 | 4.7E-09 | 3.0E-10 | 1.8E-11 |
| 150            | 1.065    | 1.0E+00                                         | 6.6E-01 | 2.9E-01 | 9.3E-02 | 2.3E-02 | 4.8E-03 | 8.2E-04 | 1.2E-04 | 1.6E-05 | 1.9E-06 | 2.0E-07 | 1.9E-08 | 1.7E-09 |
| 200            | 1.42     | 1.0E+00                                         | 7.6E-01 | 4.2E-01 | 1.7E-01 | 5.6E-02 | 1.5E-02 | 3.4E-03 | 6.8E-04 | 1.2E-04 | 1.8E-05 | 2.5E-06 | 3.2E-07 | 3.8E-08 |
| 250            | 1.775    | 1.0E+00                                         | 8.3E-01 | 5.3E-01 | 2.6E-01 | 1.0E-01 | 3.5E-02 | 9.7E-03 | 2.4E-03 | 5.1E-04 | 9.9E-05 | 1.7E-05 | 2.7E-06 | 4.0E-07 |
| 300            | 2.13     | 1.0E+00                                         | 8.8E-01 | 6.3E-01 | 3.6E-01 | 1.7E-01 | 6.5E-02 | 2.2E-02 | 6.3E-03 | 1.6E-03 | 3.7E-04 | 7.8E-05 | 1.5E-05 | 2.6E-06 |
| 350            | 2.485    | 1.0E+00                                         | 9.2E-01 | 7.1E-01 | 4.5E-01 | 2.4E-01 | 1.1E-01 | 4.1E-02 | 1.4E-02 | 4.1E-03 | 1.1E-03 | 2.6E-04 | 5.8E-05 | 1.2E-05 |
| 400            | 2.84     | 1.0E+00                                         | 9.4E-01 | 7.8E-01 | 5.4E-01 | 3.2E-01 | 1.6E-01 | 6.9E-02 | 2.6E-02 | 8.8E-03 | 2.7E-03 | 7.3E-04 | 1.8E-04 | 4.3E-05 |
| 450            | 3.195    | 1.0E+00                                         | 9.6E-01 | 8.3E-01 | 6.2E-01 | 4.0E-01 | 2.2E-01 | 1.0E-01 | 4.4E-02 | 1.7E-02 | 5.7E-03 | 1.7E-03 | 4.9E-04 | 1.3E-04 |
| 500            | 3.55     | 1.0E+00                                         | 9.7E-01 | 8.7E-01 | 6.9E-01 | 4.7E-01 | 2.8E-01 | 1.5E-01 | 6.9E-02 | 2.9E-02 | 1.1E-02 | 3.7E-03 | 1.1E-03 | 3.3E-04 |
| 550            | 3.905    | 1.0E+00                                         | 9.8E-01 | 9.0E-01 | 7.5E-01 | 5.5E-01 | 3.5E-01 | 2.0E-01 | 1.0E-01 | 4.6E-02 | 1.9E-02 | 6.9E-03 | 2.4E-03 | 7.5E-04 |
| 600            | 4.26     | 1.0E+00                                         | 9.9E-01 | 9.3E-01 | 8.0E-01 | 6.2E-01 | 4.2E-01 | 2.6E-01 | 1.4E-01 | 6.8E-02 | 3.0E-02 | 1.2E-02 | 4.5E-03 | 1.5E-03 |
| 650            | 4.615    | 1.0E+00                                         | 9.9E-01 | 9.4E-01 | 8.4E-01 | 6.8E-01 | 4.9E-01 | 3.2E-01 | 1.8E-01 | 9.6E-02 | 4.6E-02 | 2.0E-02 | 8.0E-03 | 2.9E-03 |
| 700            | 4.97     | 1.0E+00                                         | 9.9E-01 | 9.6E-01 | 8.7E-01 | 7.3E-01 | 5.5E-01 | 3.8E-01 | 2.3E-01 | 1.3E-01 | 6.6E-02 | 3.1E-02 | 1.3E-02 | 5.2E-03 |
| 750            | 5.325    | 1.0E+00                                         | 1.0E+00 | 9.7E-01 | 9.0E-01 | 7.8E-01 | 6.1E-01 | 4.4E-01 | 2.9E-01 | 1.7E-01 | 9.1E-02 | 4.5E-02 | 2.1E-02 | 8.7E-03 |
| 800            | 5.68     | 1.0E+00                                         | 1.0E+00 | 9.8E-01 | 9.2E-01 | 8.2E-01 | 6.7E-01 | 5.0E-01 | 3.4E-01 | 2.1E-01 | 1.2E-01 | 6.4E-02 | 3.1E-02 | 1.4E-02 |
| 850            | 6.035    | 1.0E+00                                         | 1.0E+00 | 9.8E-01 | 9.4E-01 | 8.5E-01 | 7.2E-01 | 5.6E-01 | 4.0E-01 | 2.6E-01 | 1.6E-01 | 8.6E-02 | 4.4E-02 | 2.1E-02 |
| 900            | 6.39     | 1.0E+00                                         | 1.0E+00 | 9.9E-01 | 9.5E-01 | 8.8E-01 | 7.6E-01 | 6.1E-01 | 4.6E-01 | 3.1E-01 | 2.0E-01 | 1.1E-01 | 6.1E-02 | 3.0E-02 |
| 950            | 6.745    | 1.0E+00                                         | 1.0E+00 | 9.9E-01 | 9.6E-01 | 9.0E-01 | 8.0E-01 | 6.7E-01 | 5.1E-01 | 3.6E-01 | 2.4E-01 | 1.4E-01 | 8.1E-02 | 4.3E-02 |
| 1000           | 7.1      | 1.0E+00                                         | 1.0E+00 | 9.9E-01 | 9.7E-01 | 9.2E-01 | 8.4E-01 | 7.1E-01 | 5.7E-01 | 4.2E-01 | 2.8E-01 | 1.8E-01 | 1.1E-01 | 5.8E-02 |

**Table S5.** Determination of consensus site enrichment. This table shows the probability of observing a given number of Cdk1 consensus sites in a protein of a certain length, as determined by the Poisson distribution. p-values of less than 0.01 (indicated in red) were used to define enrichment of consensus sites in Fig. 4B.

| Protein | <i>S. cerevisiae</i> | <i>C. albicans</i> | <i>S. pombe</i> | <i>X. laevis</i> | <i>H. sapiens</i> | References |
|---------|----------------------|--------------------|-----------------|------------------|-------------------|------------|
| Cdc6    | X                    |                    | X               |                  | X                 | 21 - 25    |
| Cdh1    | X                    |                    |                 |                  | X                 | 26 - 28    |
| Fkh2    | X                    |                    | X               |                  |                   | 29, 30     |
| Iqg1    |                      | X                  |                 |                  |                   | 31         |
| Mcm3    | X                    |                    |                 |                  | X                 | 32, 33     |
| Orc2    | X                    |                    | X               |                  |                   | 34, 35     |
| Rga2    | X                    | X                  |                 |                  |                   | 36, 37     |
| Swe1    | X                    |                    | X               | X                | X                 | 38 - 40    |

**Table S6.** Conservation of Cdk1 substrate regulation in other species. Previous studies provide examples of conserved biological function for shifting phosphorylation site clusters that we identified in the eight proteins listed in the left column. In many cases, conservation of regulation has persisted from *S. cerevisiae* to *Schizosaccharomyces pombe* or *Homo sapiens*. These proteins appear to be more predominantly regulated by plastic mechanisms than the general set of sites we identified (i.e. they exhibit significantly older site enrichment than the other 299 substrates [t-test  $p = 0.016$ ] but not significantly older conservation of precise position [t-test  $p = 0.18$ ]).



## References

1. A. C. Bishop *et al.*, *Nature* **407**, 395 (2000).
2. A. Gruhler *et al.*, *Mol Cell Proteomics* **4**, 310 (2005).
3. F. Stegmeier, R. Visintin, A. Amon, *Cell* **108**, 207 (2002).
4. F. Stegmeier, A. Amon, *Annu Rev Genet* **38**, 203 (2004).
5. S. A. Beausoleil, J. Villen, S. A. Gerber, J. Rush, S. P. Gygi, *Nat Biotechnol* **24**, 1285 (2006).
6. J. Villen, S. A. Beausoleil, S. A. Gerber, S. P. Gygi, *Proc Natl Acad Sci U S A* **104**, 1488 (2007).
7. J. Villen, S. P. Gygi, *Nat Protoc* **3**, 1630 (2008).
8. J. E. Elias, S. P. Gygi, *Nat Methods* **4**, 207 (2007).
9. C. E. Bakalarski *et al.*, *J Proteome Res* **7**, 4756 (2008).
10. E. Quevillon *et al.*, *Nucleic Acids Res* **33**, W116 (2005).
11. K. Shimizu, S. Hirose, T. Noguchi, *Bioinformatics* **23**, 2337 (2007).
12. D. T. Jones, *J Mol Biol* **292**, 195 (1999).
13. K. Peng, P. Radivojac, S. Vucetic, A. K. Dunker, Z. Obradovic, *BMC Bioinformatics* **7**, 208 (2006).
14. T. Ishida, K. Kinoshita, *Nucleic Acids Res* **35**, W460 (2007).
15. B. B. Tuch, D. J. Galgoczy, A. D. Hernday, H. Li, A. D. Johnson, *PLoS Biol* **6**, e38 (2008).
16. F. Chen, A. J. Mackey, C. J. Stoeckert, Jr., D. S. Roos, *Nucleic Acids Res* **34**, D363 (2006).
17. K. Kakiuchi *et al.*, *Biochemistry* **46**, 7781 (2007).
18. S. Ghaemmaghami *et al.*, *Nature* **425**, 737 (2003).
19. J. A. Ubersax *et al.*, *Nature* **425**, 859 (2003).
20. E. I. Boyle *et al.*, *Bioinformatics* **20**, 3710 (2004).
21. A. Calzada, M. Sanchez, E. Sanchez, A. Bueno, *J Biol Chem* **275**, 9734 (2000).
22. B. Baum, H. Nishitani, S. Yanow, P. Nurse, *EMBO J* **17**, 5689 (1998).
23. A. Lopez-Girona, O. Mondesert, J. Leatherwood, P. Russell, *Mol Biol Cell* **9**, 63 (1998).
24. V. Q. Nguyen, C. Co, J. J. Li, *Nature* **411**, 1068 (2001).

25. N. Mailand, J. F. Diffley, *Cell* **122**, 915 (2005).
26. W. Zachariae, M. Schwab, K. Nasmyth, W. Seufert, *Science* **282**, 1721 (1998).
27. S. L. Jaspersen, J. F. Charles, D. O. Morgan, *Curr. Biol.* **9**, 227 (1999).
28. E. R. Kramer, N. Scheuringer, A. V. Podtelejnikov, M. Mann, J. M. Peters, *Mol Biol Cell* **11**, 1555 (2000).
29. A. Pic-Taylor, Z. Darieva, B. A. Morgan, A. D. Sharrocks, *Mol Cell Biol* **24**, 10036 (2004).
30. M. Shimada *et al.*, *EMBO J* **27**, 132 (2008).
31. C. R. Li, Y. M. Wang, Y. Wang, *EMBO J* **27**, 2998 (2008).
32. V. Q. Nguyen, C. Co, K. Irie, J. J. Li, *Curr Biol* **10**, 195 (2000).
33. D. I. Lin, P. Aggarwal, J. A. Diehl, *Proc Natl Acad Sci U S A* **105**, 8079 (2008).
34. A. Vas, W. Mok, J. Leatherwood, *Mol Cell Biol* **21**, 5767 (2001).
35. D. Remus, M. Blanchette, D. C. Rio, M. R. Botchan, *J Biol Chem* **280**, 39740 (2005).
36. R. Sopko, D. Huang, J. C. Smith, D. Figeys, B. J. Andrews, *EMBO J* **26**, 4487 (2007).
37. X. D. Zheng, R. T. Lee, Y. M. Wang, Q. S. Lin, Y. Wang, *EMBO J* **26**, 3760 (2007).
38. S. Y. Kim, J. E. Ferrell, Jr., *Cell* **128**, 1133 (2007).
39. S. Y. Kim, E. J. Song, K. J. Lee, J. E. Ferrell, Jr., *Mol Cell Biol* **25**, 10580 (2005).
40. S. L. Harvey, A. Charlet, W. Haas, S. P. Gygi, D. R. Kellogg, *Cell* **122**, 407 (2005).

## Supporting databases (Excel spreadsheets)

**Database S1.** Complete list of phosphopeptides. Three separate quantitative (SILAC) experiments were performed to identify Cdk1 substrates by specific kinase inhibition (each is presented as a separate sheet): first, using a population of asynchronous cells (cdk1as\_asynchronous), second, using metaphase-arrested cells (cdk1as\_nocodazole), and third, using cells arrested in late mitosis by expression of a non-degradable truncated cyclin (cdk1as\_clb2). Usually twelve fractions for each experiment were analyzed in duplicate by LC-MS/MS (see details in each sheet). A total of 354,560 MS/MS spectra were collected. For database searching we used the Sequest algorithm against a composite target/decoy *S. cerevisiae* ORF protein sequence database, which allowed for the determination of a false-positive rate based on the number of reverse-sequence identifications in the final list. Sequest results were filtered based on criteria described in the Supplementary Methods section above. The final list contained 111,547 peptide spectral matches, of which 74,093 were phosphopeptides with 250 phosphopeptide reverse-sequence matches. The estimated false-discovery rate in phosphopeptide identification of the data set provided here (containing 73,843 phosphopeptides after removing reverse-hits) is 0.34%.

All MS/MS spectra successfully matching phosphopeptides are provided as active links. Phosphorylation sites are followed by the "\*" symbol, heavy-labeled lysines and arginines are denoted by "#" and "@" symbols, respectively, and oxidized methionines are denoted by the "^" symbol. An A-score value was calculated for each phosphorylation site on the peptide, and their values are listed from N to C terminus. Peptides with only one possibility of phosphorylation site(s) location did not require an A-score calculation and the Ascore\_1 column shows "1000". Those sites with A-score values > 13 were considered localized with >95% certainty; otherwise, they were called ambiguous, and the region in the peptide sequence where the phosphorylation can be localized is provided (columns region\_1, region\_2, region\_3; numbers denote distance from the residue where the phosphorylation has been arbitrarily placed). After removing redundancy from this list, 10,656 non-redundant phosphorylation sites were identified in 2,517 proteins. dCn' is defined here as the dCn value from the Sequest output file to the first peptide of different sequence (excluding modifications).

**Database S2.** High confidence phosphorylation sites from the three biological experiments. This list shows all unique phosphorylation sites that were identified with high confidence quantification (Vista score  $\geq 86$  and signal to noise S/N average  $\geq 3$ ) and  $>95\%$  confidence in the precise localization of the phosphorylation site (Ascore  $> 13$ ). The complete list of all phosphorylation sites is presented in the first sheet (all\_experiments). This table also shows the sequence context of the phosphorylated residue (centered\_15mer). Three columns (columns F-H:  $\log_2$ H/L\_asynchronous,  $\log_2$ H/L\_nocodazole,  $\log_2$ H/L\_clb2) provide the quantification of H/L ratios for every experiment in which that phosphorylation event was observed (note: when only the light or heavy peptide was observed, the signal to noise background level was used to define the ratio. These quantifications are denoted with  $<$  or  $>$  symbols). To remove redundancy from multiple peptides, we used the H/L value from the peptide with the best quantification (Vista score) and signal to noise (S/N average). Where phosphorylation events were observed in multiple high confidence peptides, we used the H/L value from the peptide with the least number of non-(S/T)\*-P phosphorylation sites to minimize the number of false positives in our Cdk1-dependent dataset (i.e. phosphopeptides whose abundance change could possibly be assigned to other dynamic phosphorylation events). This database includes a small number of peptides phosphorylated on tyrosine and a small number of sites that fail to align perfectly with the yeast genome S288C sequence; these sites were not included in the analysis in Figure 1 or other figures.

The subsequent sheets contain lists of the precise peptide sequences obtained in each of the three experiments (as described above) - asynchronous cells (asynchronous), metaphase-arrested cells (nocodazole), and cells arrested in late mitosis (clb2).
